# Supplementary material for: Electrochemical synthesis of 1-N-phenyl-4-(sulfonyl)benzene-1,2-diamine derivatives: a mild and regioselective protocol
Source: Royal Society of Chemistry journal article supplement (doi:10.1039/c5nj03514g), 2016-01-01
Supplement: c5nj03514g1.pdf [file c5nj03514g1.pdf]

# Supporting Information

New Journal of Chemistry

## Electrochemical Synthesis of 1-*N*-phenyl-4-(arylsulfonyl)benzene-1,2-diamine Derivatives. A Mild and Regioselective Protocol

Mahnaz Sharafi-Kolkeshvandi,<sup>a</sup> Davood Nematollahi,<sup>\*b</sup> Farzad Nikpour,<sup>a</sup> and Eslam Salahifar<sup>b</sup>

<sup>a</sup>*Department of Chemistry, Faculty of Sciences, University of Kurdistan, P.O. Box 66315-416, Sanandaj, Iran.*

<sup>b</sup>*Faculty of Chemistry, Bu-Ali-Sina University, Hamedan 65174, Iran.*

[nemat@basu.ac.ir](mailto:nemat@basu.ac.ir)

## Table of Contents:

|     |                                                                    |             |
|-----|--------------------------------------------------------------------|-------------|
| 1.  | Arrangement of the electrodes and cell                             | Page IV     |
| 2.  | $^1\text{H}$ NMR spectrum of 3a                                    | Page V      |
| 3.  | Expanded $^1\text{H}$ NMR spectrum of 3a                           | Page VI     |
| 4.  | $^1\text{H}$ NMR spectrum of 3a (with $\text{D}_2\text{O}$ )       | Page VII    |
| 5.  | Expanded $^1\text{H}$ NMR spectrum of 3a with $\text{D}_2\text{O}$ | Page VIII   |
| 6.  | $^{13}\text{C}$ NMR spectrum of 3a                                 | Page IX     |
| 7.  | Expanded $^{13}\text{C}$ NMR spectrum of 3a                        | Page X      |
| 8.  | MS spectrum of 3a                                                  | Page XI     |
| 9.  | FT-IR spectrum of 3a                                               | Page XII    |
| 10. | $^1\text{H}$ NMR spectrum of 3b                                    | Page XIII   |
| 11. | Expanded $^1\text{H}$ NMR spectrum of 3b                           | Page XIV    |
| 12. | $^1\text{H}$ NMR spectrum of 3b (with $\text{D}_2\text{O}$ )       | Page XV     |
| 13. | Expanded $^1\text{H}$ NMR spectrum of 3b with $\text{D}_2\text{O}$ | Page XVI    |
| 14. | $^{13}\text{C}$ NMR spectrum of 3b                                 | Page XVII   |
| 15. | Expanded $^{13}\text{C}$ NMR spectrum of 3b                        | Page XVIII  |
| 16. | MS spectrum of 3b                                                  | Page XIX    |
| 17. | FT-IR spectrum of 3b                                               | Page XX     |
| 18. | $^1\text{H}$ NMR spectrum of 3c                                    | Page XXI    |
| 19. | Expanded $^1\text{H}$ NMR spectrum of 3c                           | Page XXII   |
| 20. | $^{13}\text{C}$ NMR spectrum of 3c                                 | Page XXIII  |
| 21. | Expanded $^{13}\text{C}$ NMR spectrum of 3c                        | Page XXIV   |
| 22. | $^{13}\text{C}$ -DEPT-135 spectrum of 3c                           | Page XXV    |
| 23. | $^{13}\text{C}$ -DEPT-135 expanded spectrum of 3c                  | Page XXVI   |
| 24. | 2D HMBC spectrum of 3c                                             | Page XXVII  |
| 25. | 2D HMBC expanded spectrum of 3c                                    | Page XXVIII |
| 26. | 2D $^1\text{H}$ - $^1\text{H}$ COSY spectrum of 3c                 | Page XXIX   |
| 27. | 2D $^1\text{H}$ - $^1\text{H}$ COSY expanded spectrum of 3c        | Page XXX    |
| 28. | MS spectrum of 3c                                                  | Page XXXI   |

|    |                                                         |              |
|----|---------------------------------------------------------|--------------|
| 29 | FT-IR spectrum of 3c                                    | Page XXXII   |
| 30 | $^1\text{H}$ NMR spectrum of 3d                         | Page XXXIII  |
| 31 | $^1\text{H}$ NMR spectrum in $\text{D}_2\text{O}$ of 3d | Page XXXIV   |
| 32 | $^{13}\text{C}$ NMR spectrum of 3d                      | Page XXXV    |
| 33 | Expanded $^{13}\text{C}$ NMR spectrum of 3d             | Page XXXVI   |
| 34 | Mass spectrum of 3d                                     | Page XXXVII  |
| 35 | FTIR spectrum of 3d                                     | Page XXXVIII |
| 36 | Cyclic voltammograms of 2ADPA in the presence of 1a     | Page XXXIX   |
| 37 | Summary of Data CCDC                                    | Page XL      |
| 38 | Crystal data and structure refinement                   | Page XLI     |
| 39 | Atomic coordinates                                      | Page XLII    |
| 40 | Bond lengths [Å] and angles                             | Page XLIII   |
| 41 | Anisotropic displacement parameters                     | Page XLVII   |

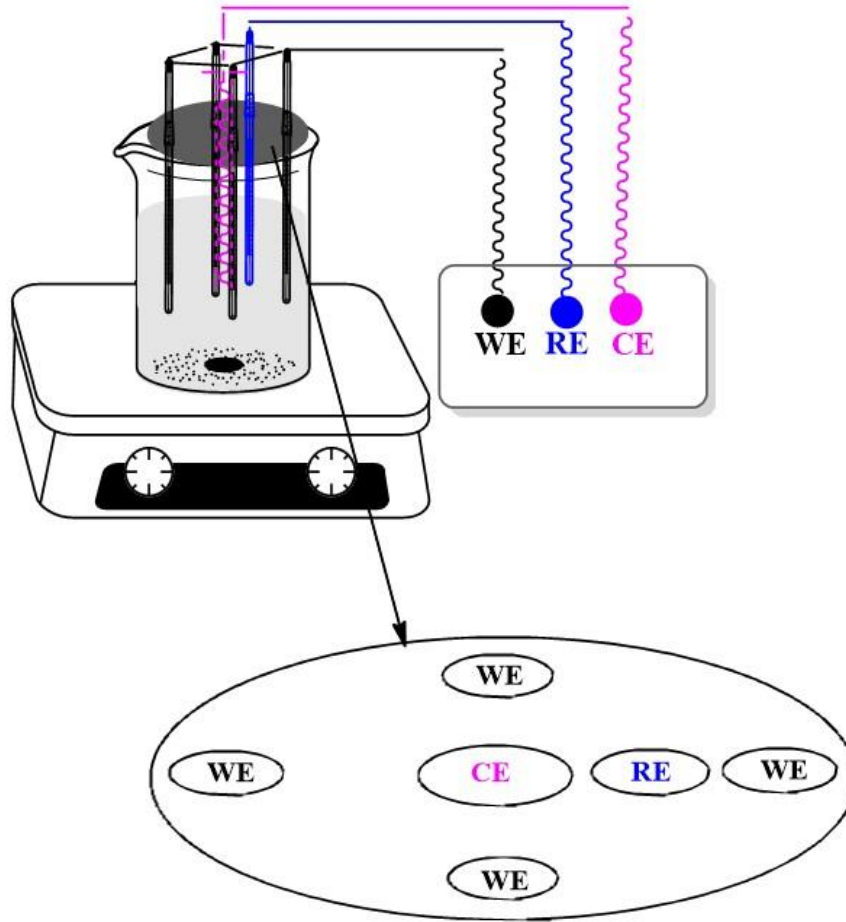

Arrangement of the electrodes and cell

<sup>1</sup>H NMR spectrum of 3a

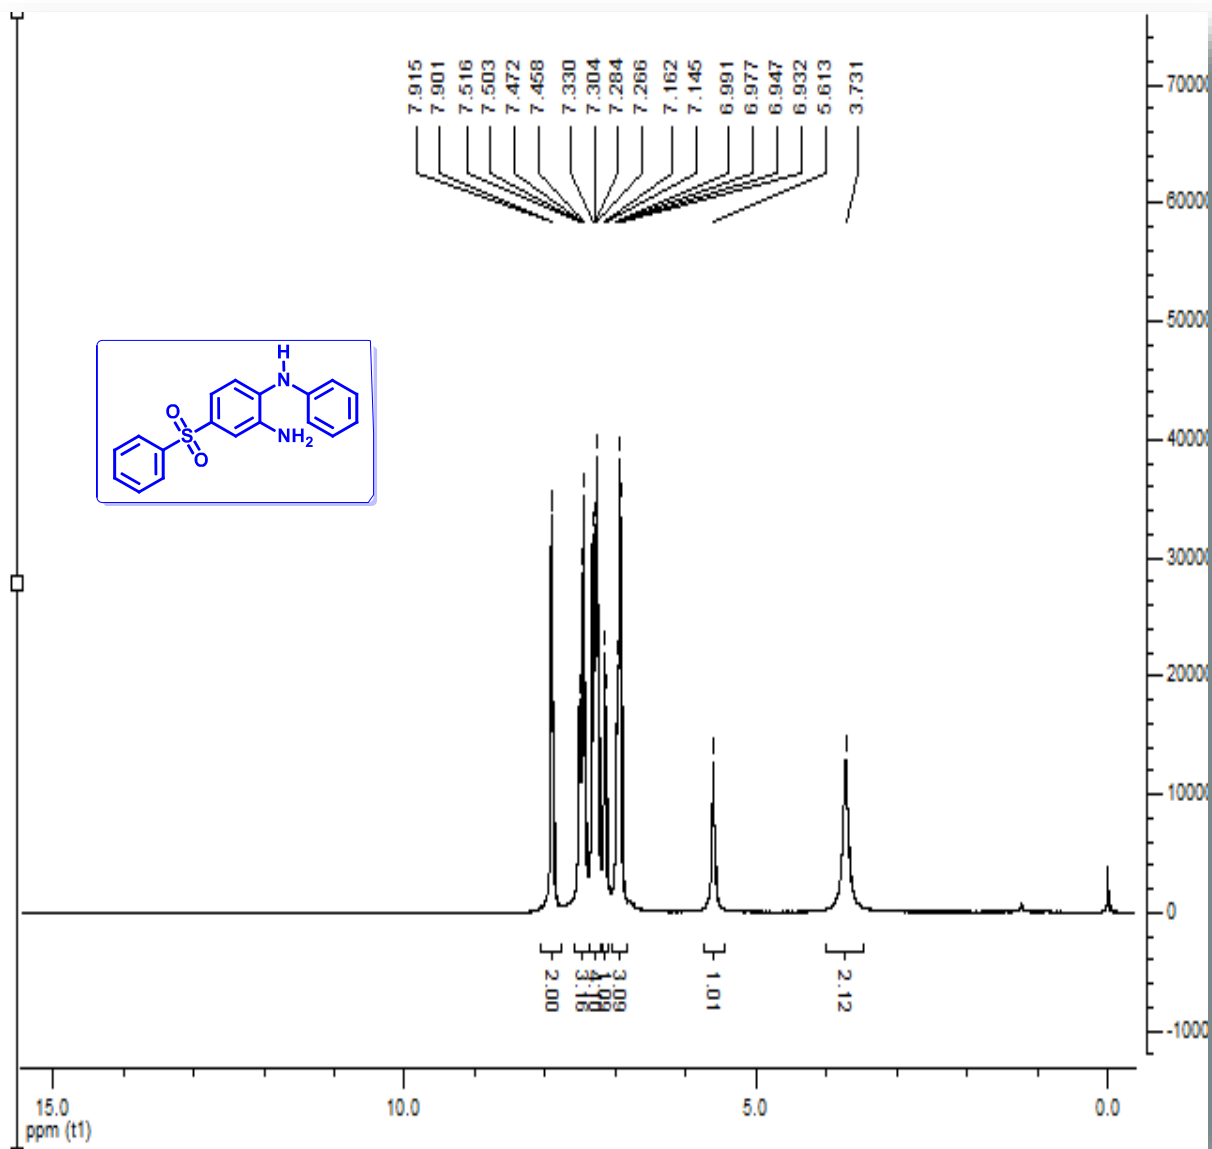

### Expanded $^1\text{H}$ NMR spectrum of 3a

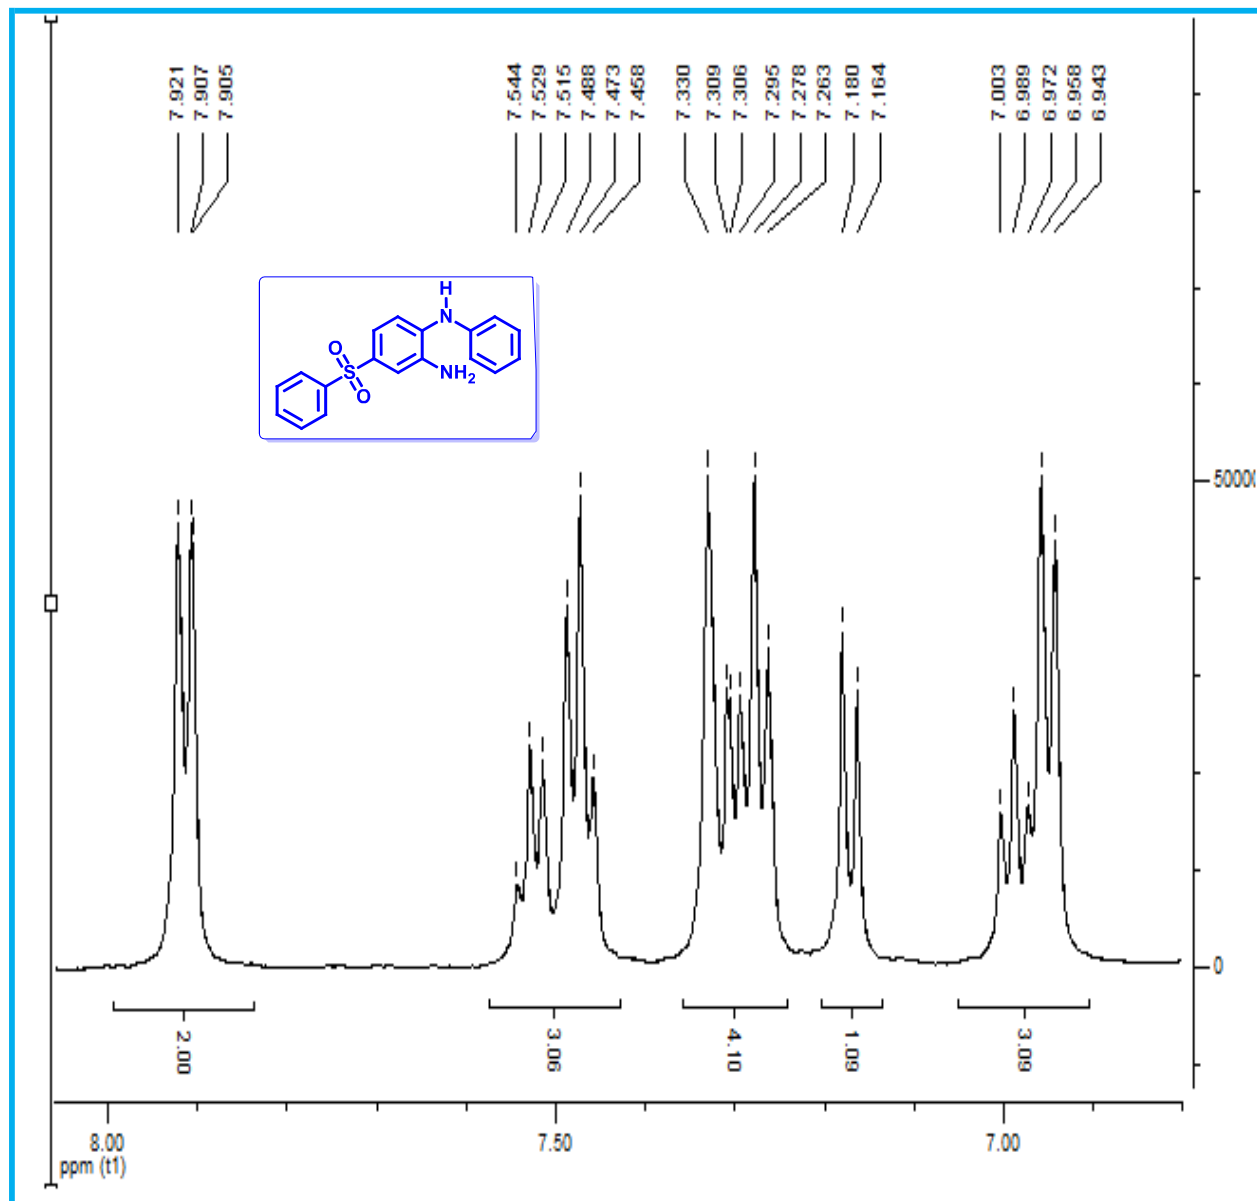

<sup>1</sup>H NMR spectrum of 3a (with D<sub>2</sub>O)

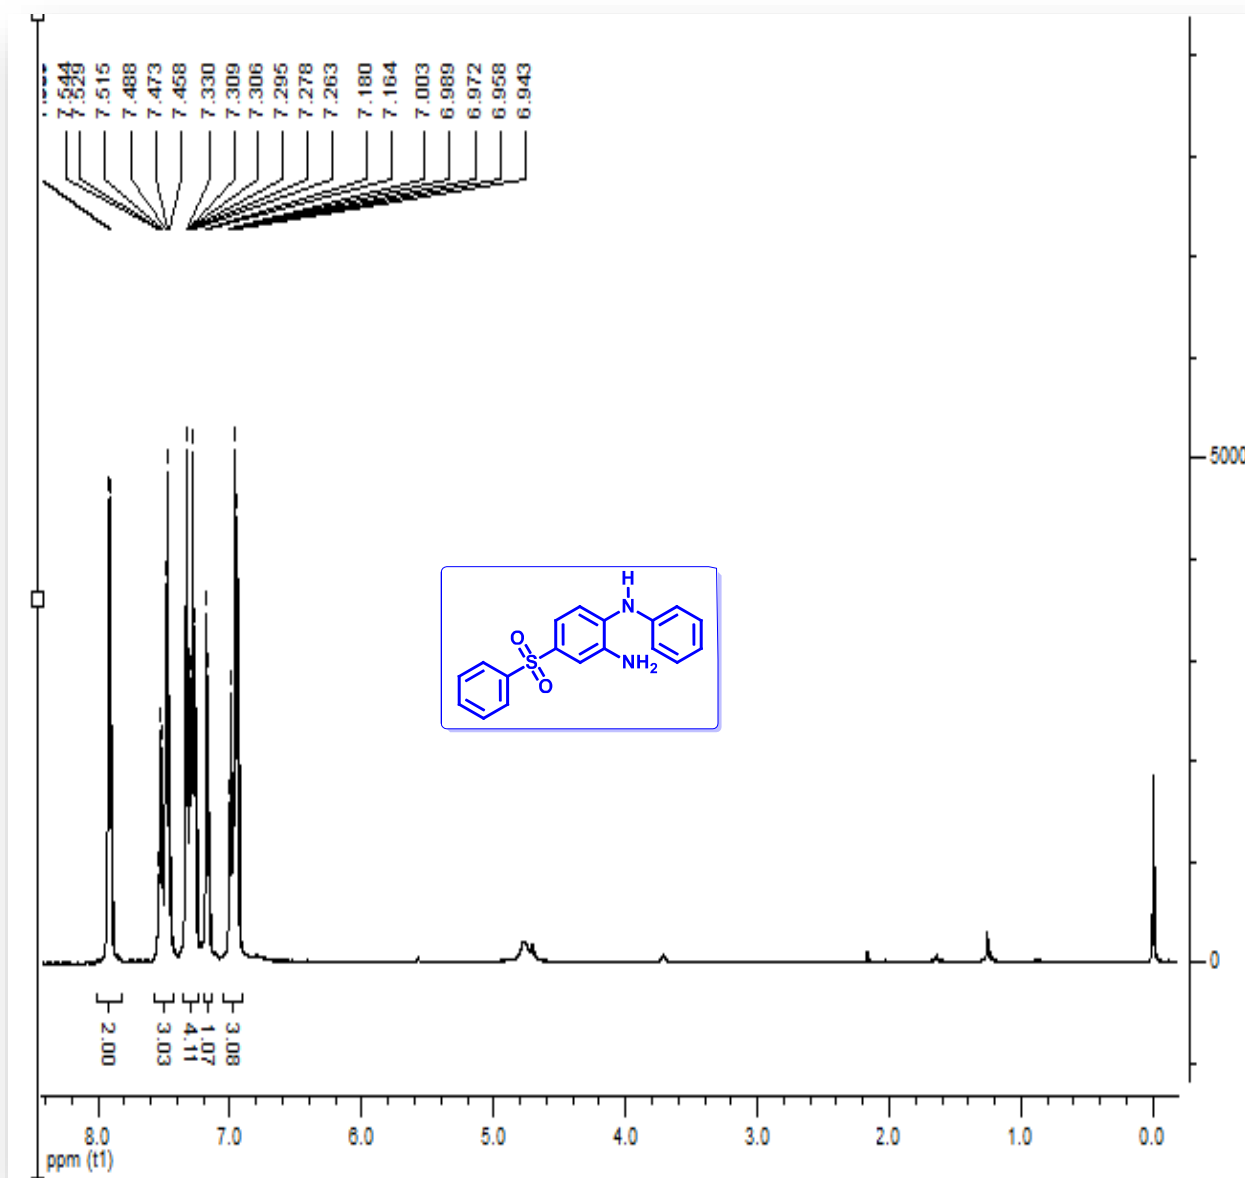

# Expanded $^1\text{H}$ NMR spectrum of 3a with $\text{D}_2\text{O}$

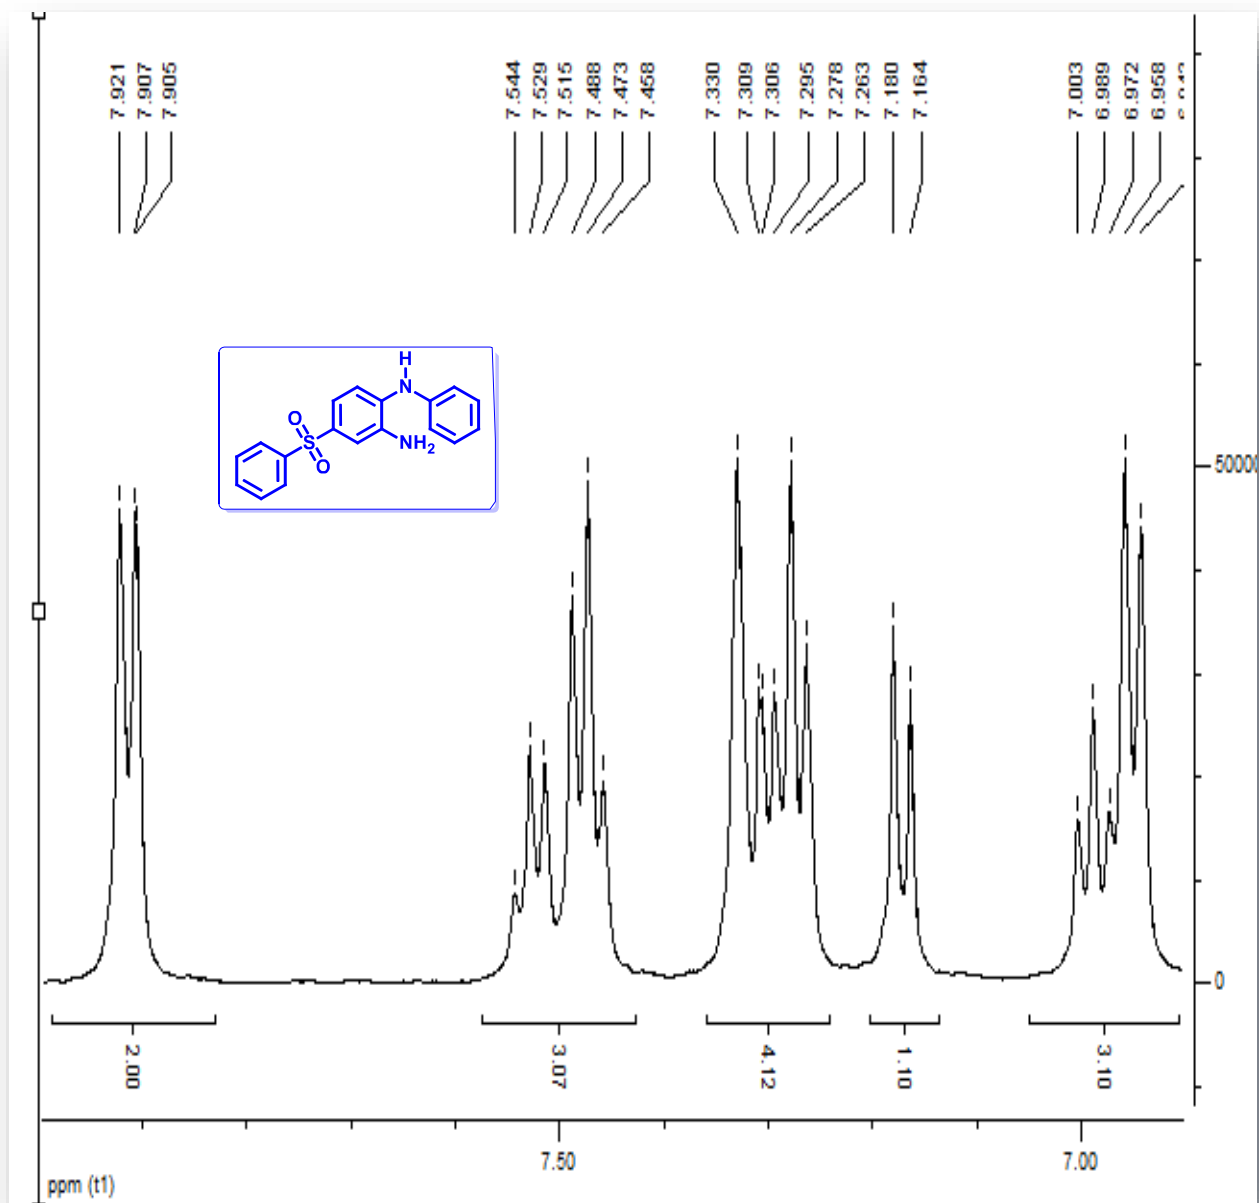



<sup>13</sup>C NMR spectrum of 3a

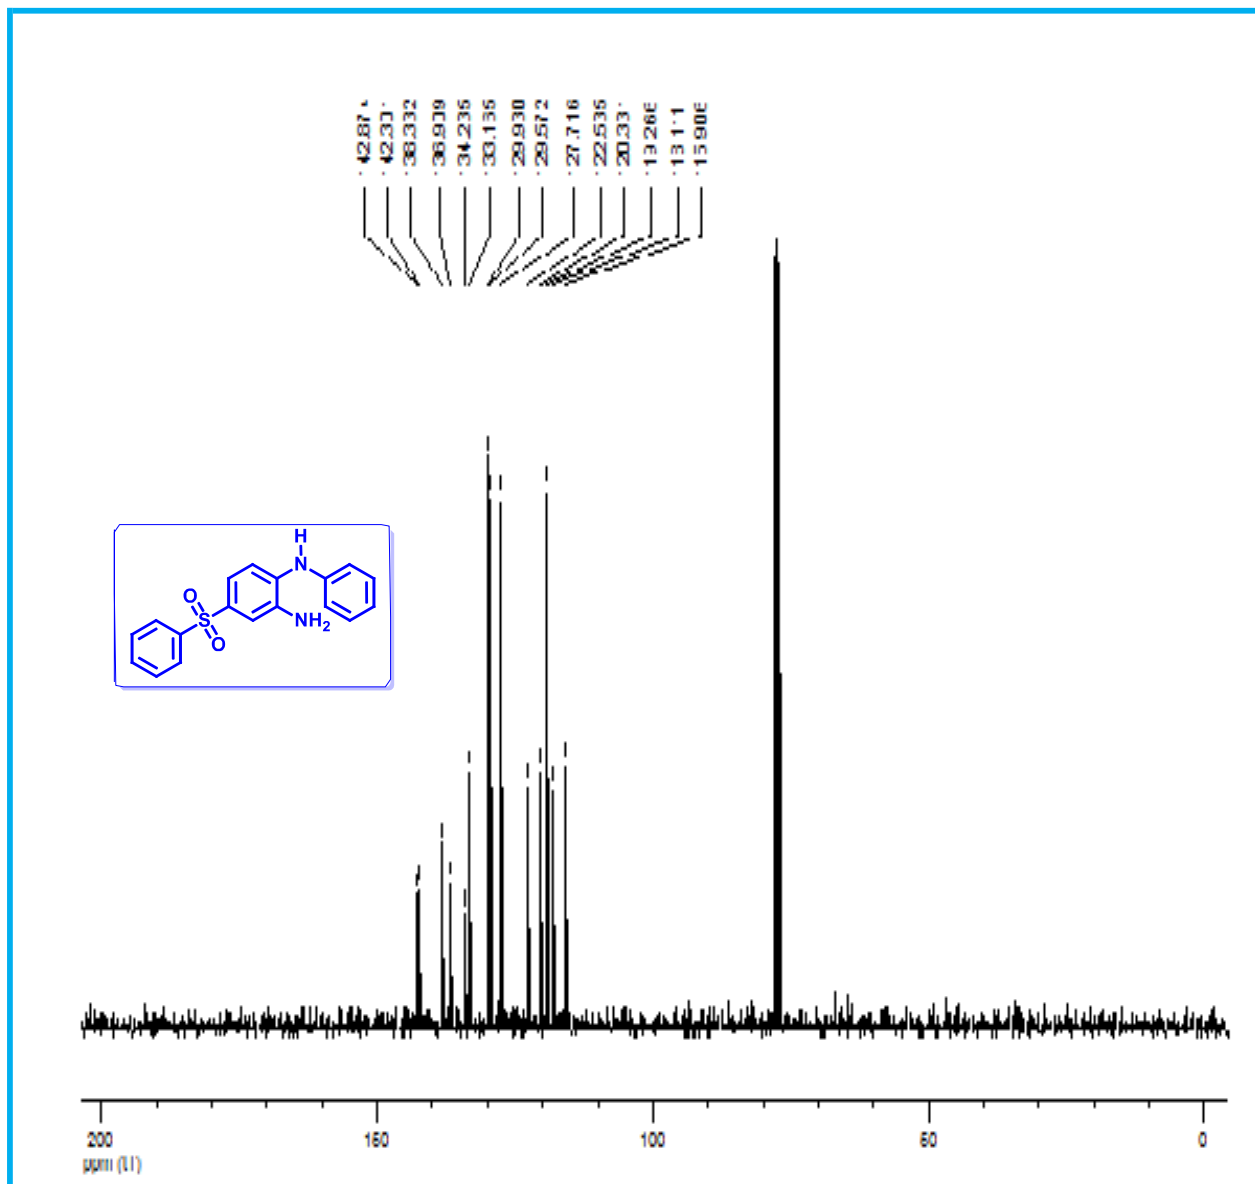

# Expanded $^{13}\text{C}$ NMR spectrum of 3a

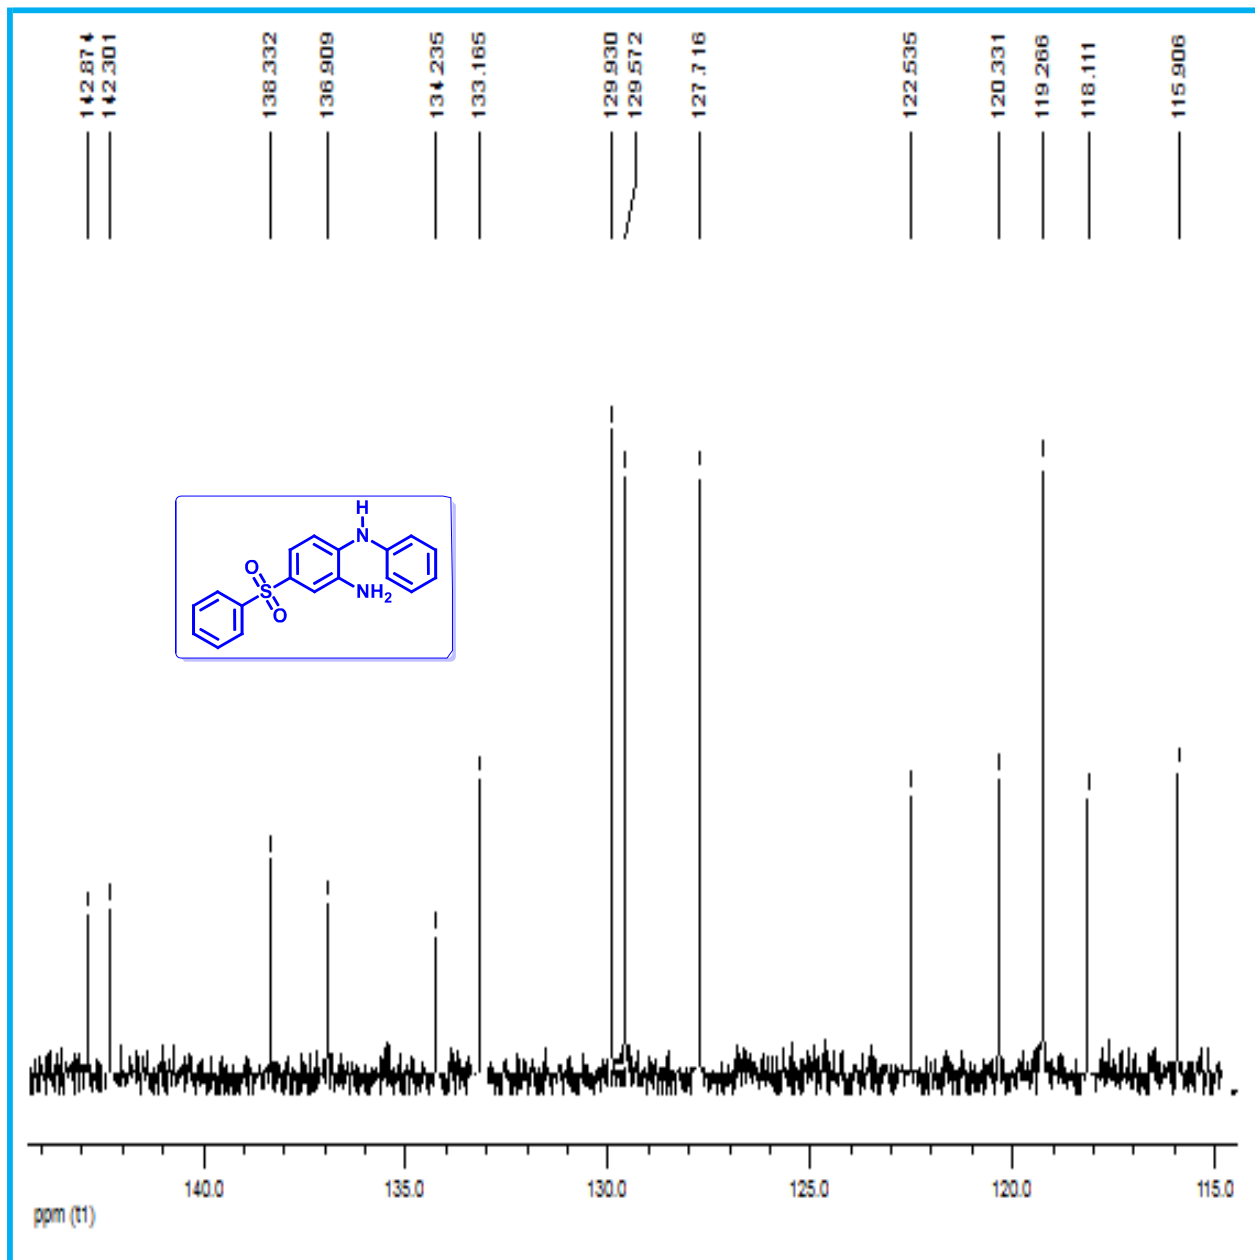

# MS spectrum of 3a

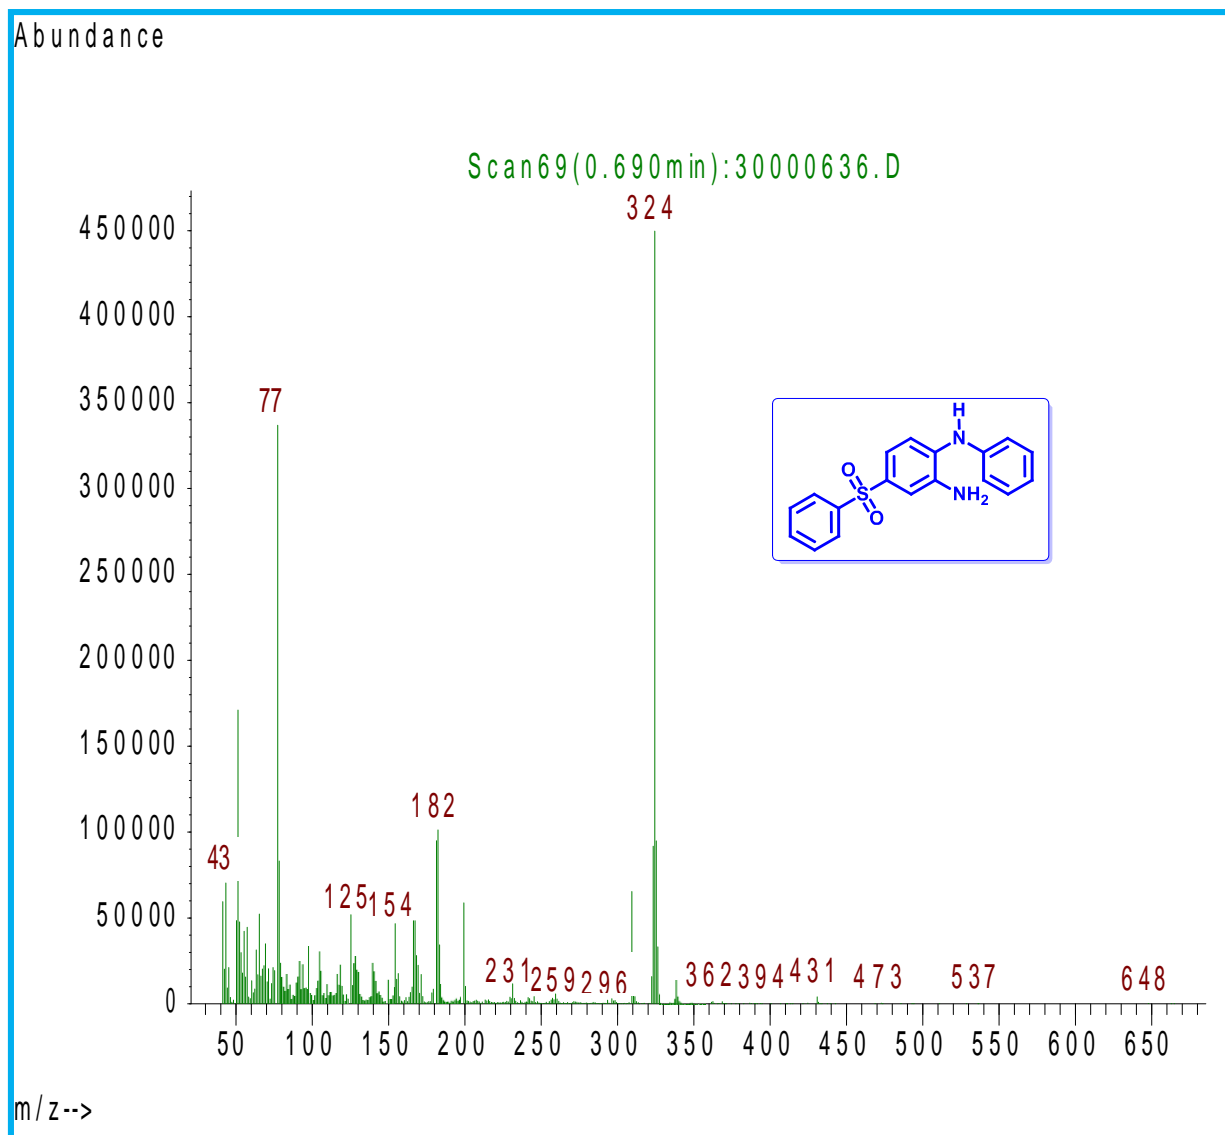

FT-IR spectrum of 3a

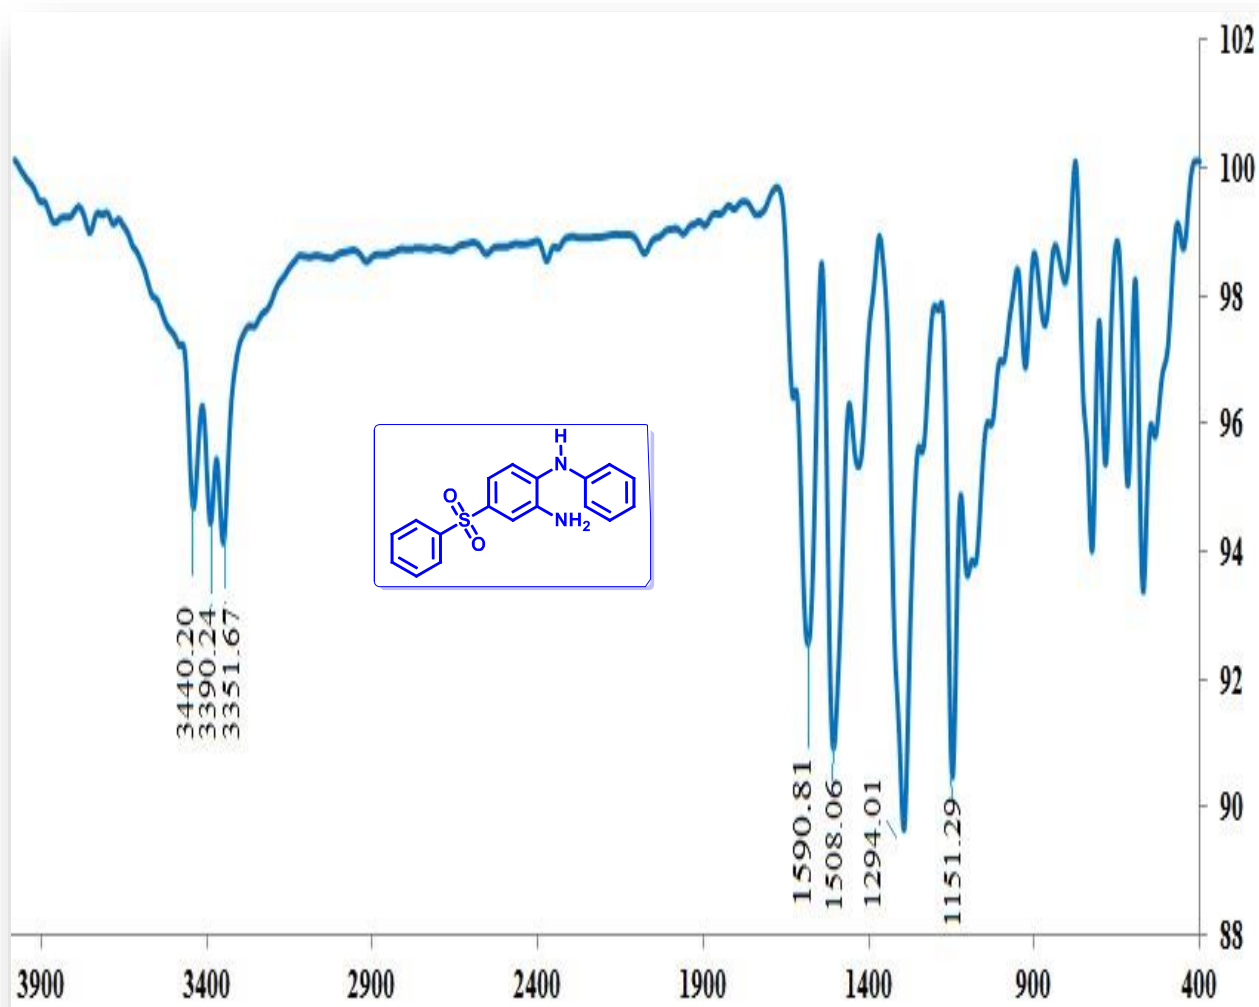

<sup>1</sup>H NMR spectrum of 3b

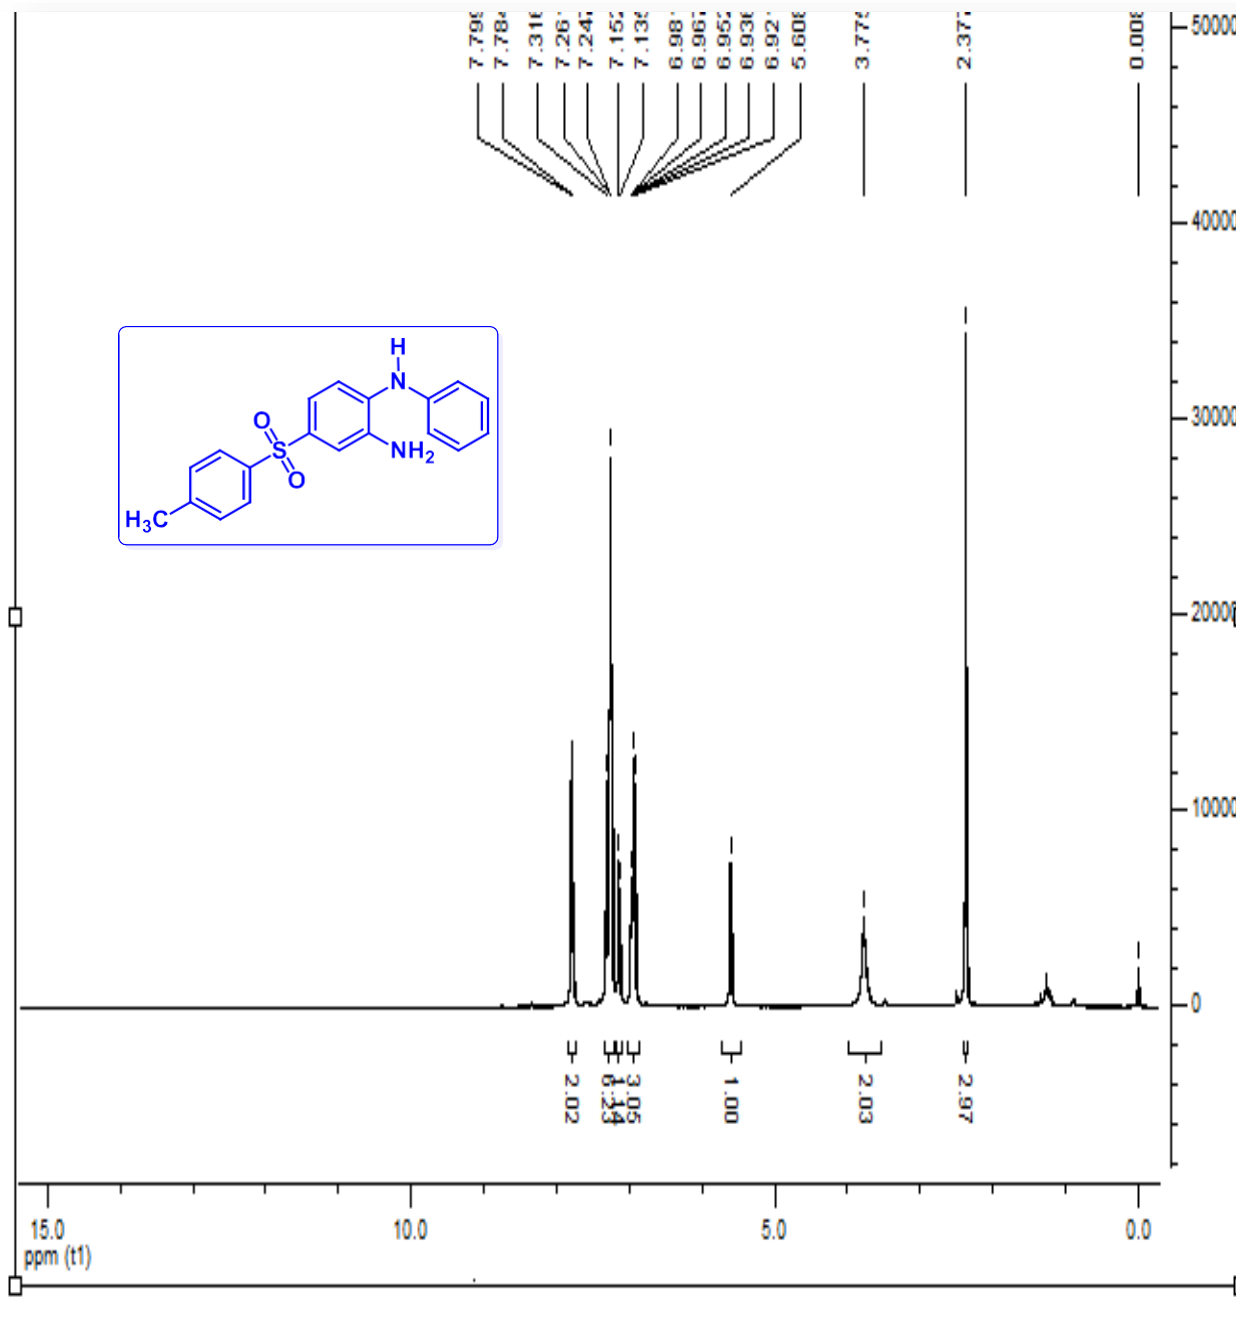

# Expanded <sup>1</sup>H NMR spectrum of 3b

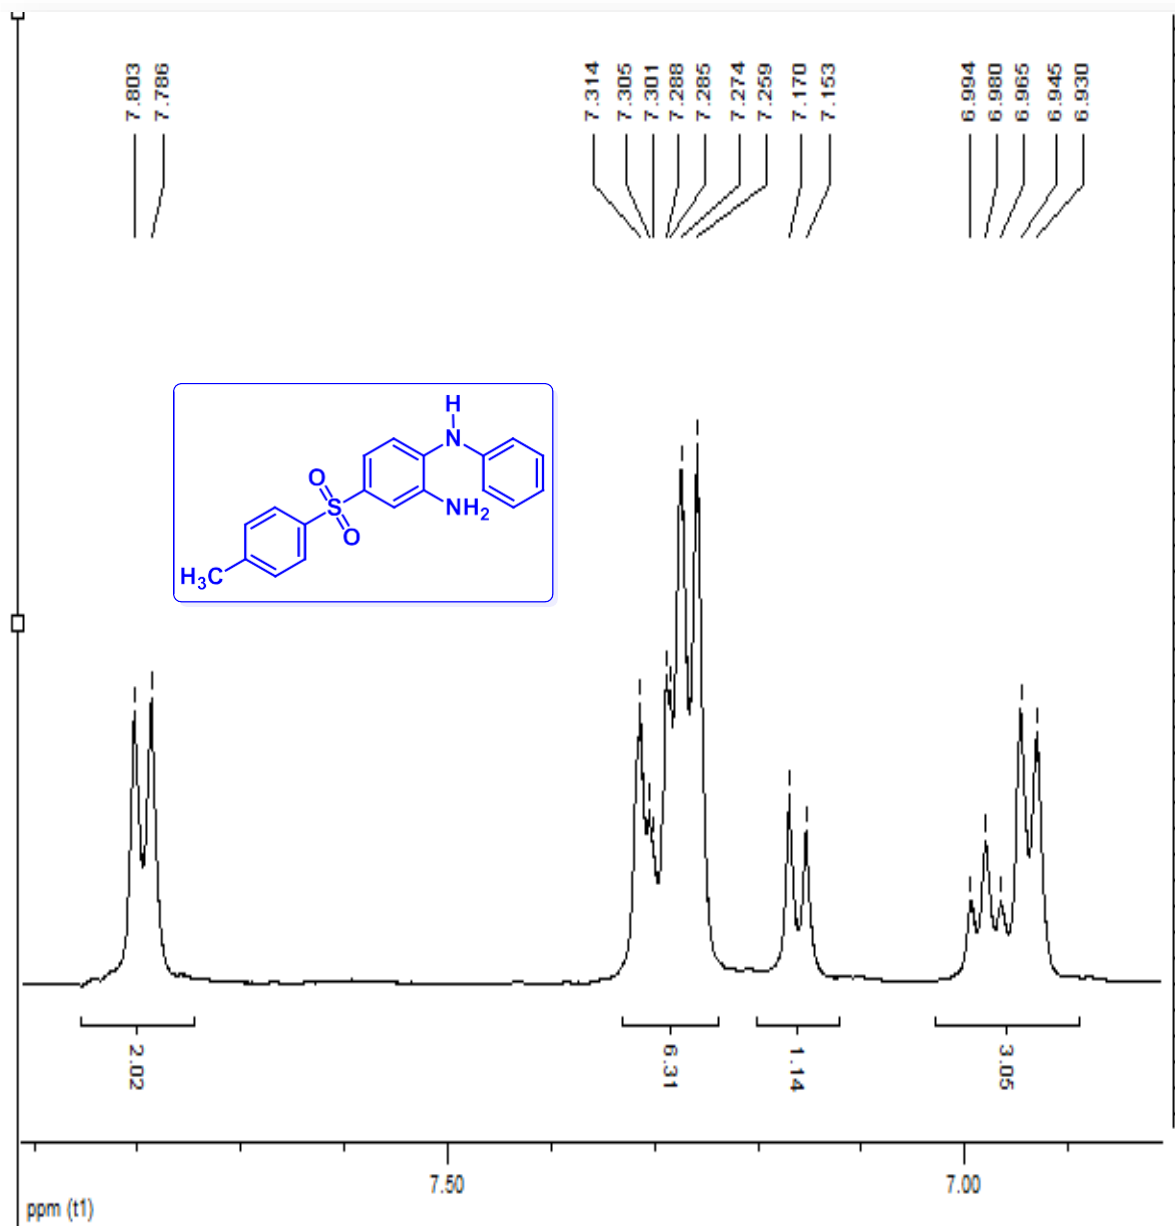

<sup>1</sup>H NMR spectrum of 3b (with D<sub>2</sub>O)

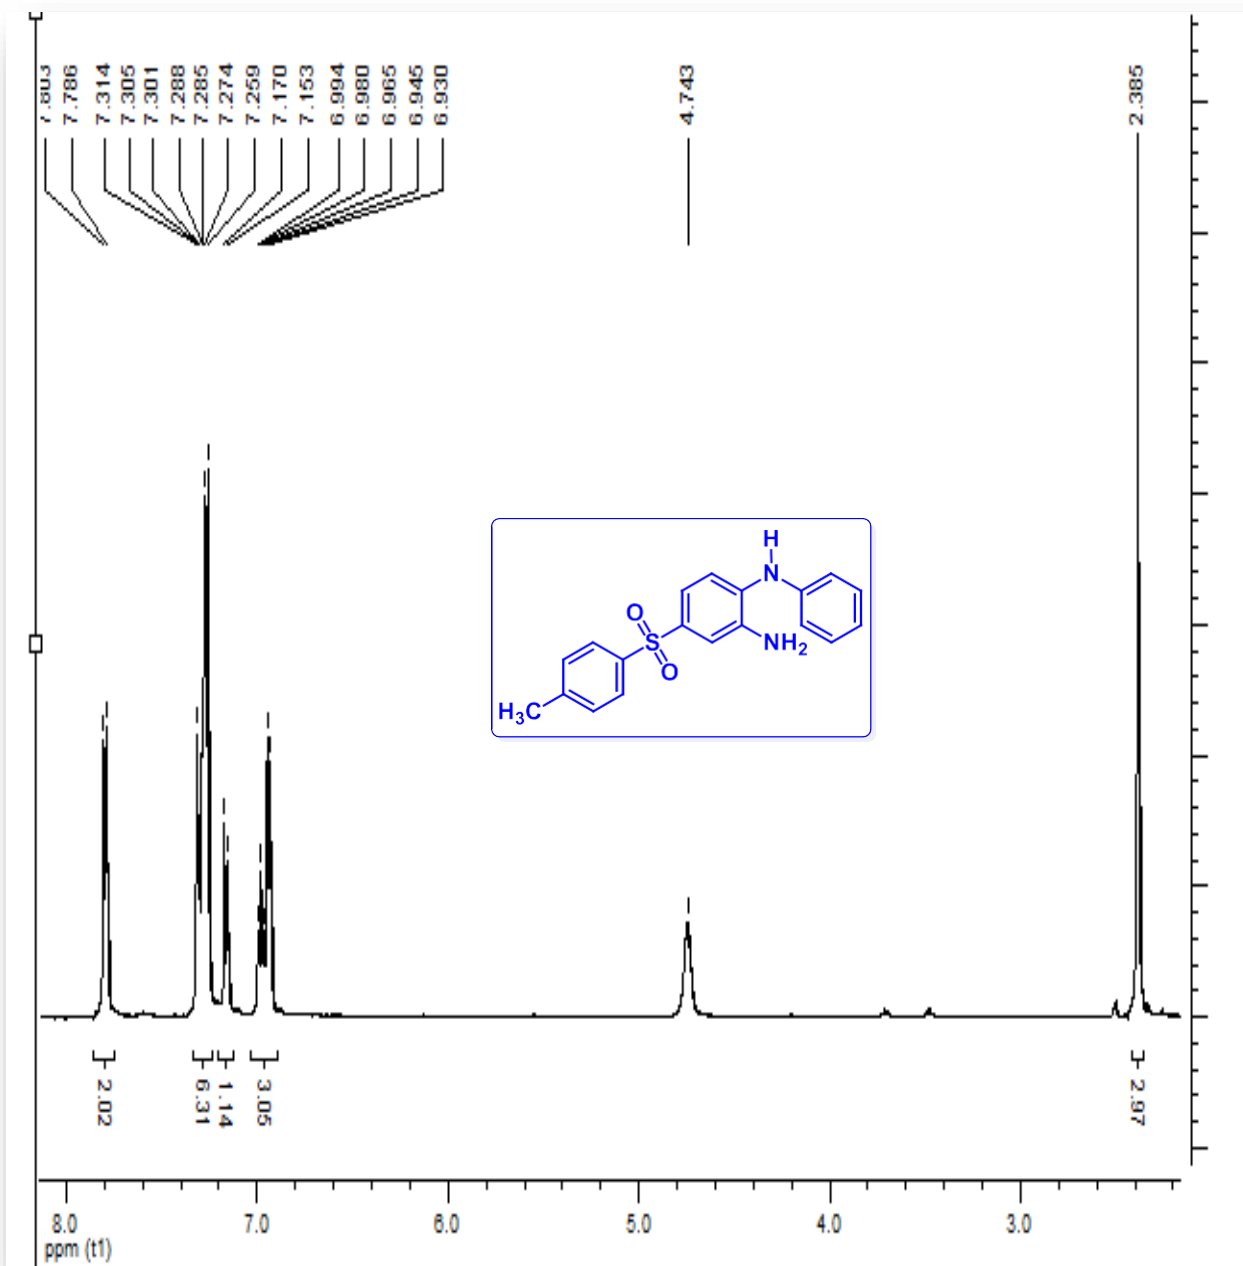

Expanded  $^1\text{H}$  NMR spectrum of 3b with  $\text{D}_2\text{O}$

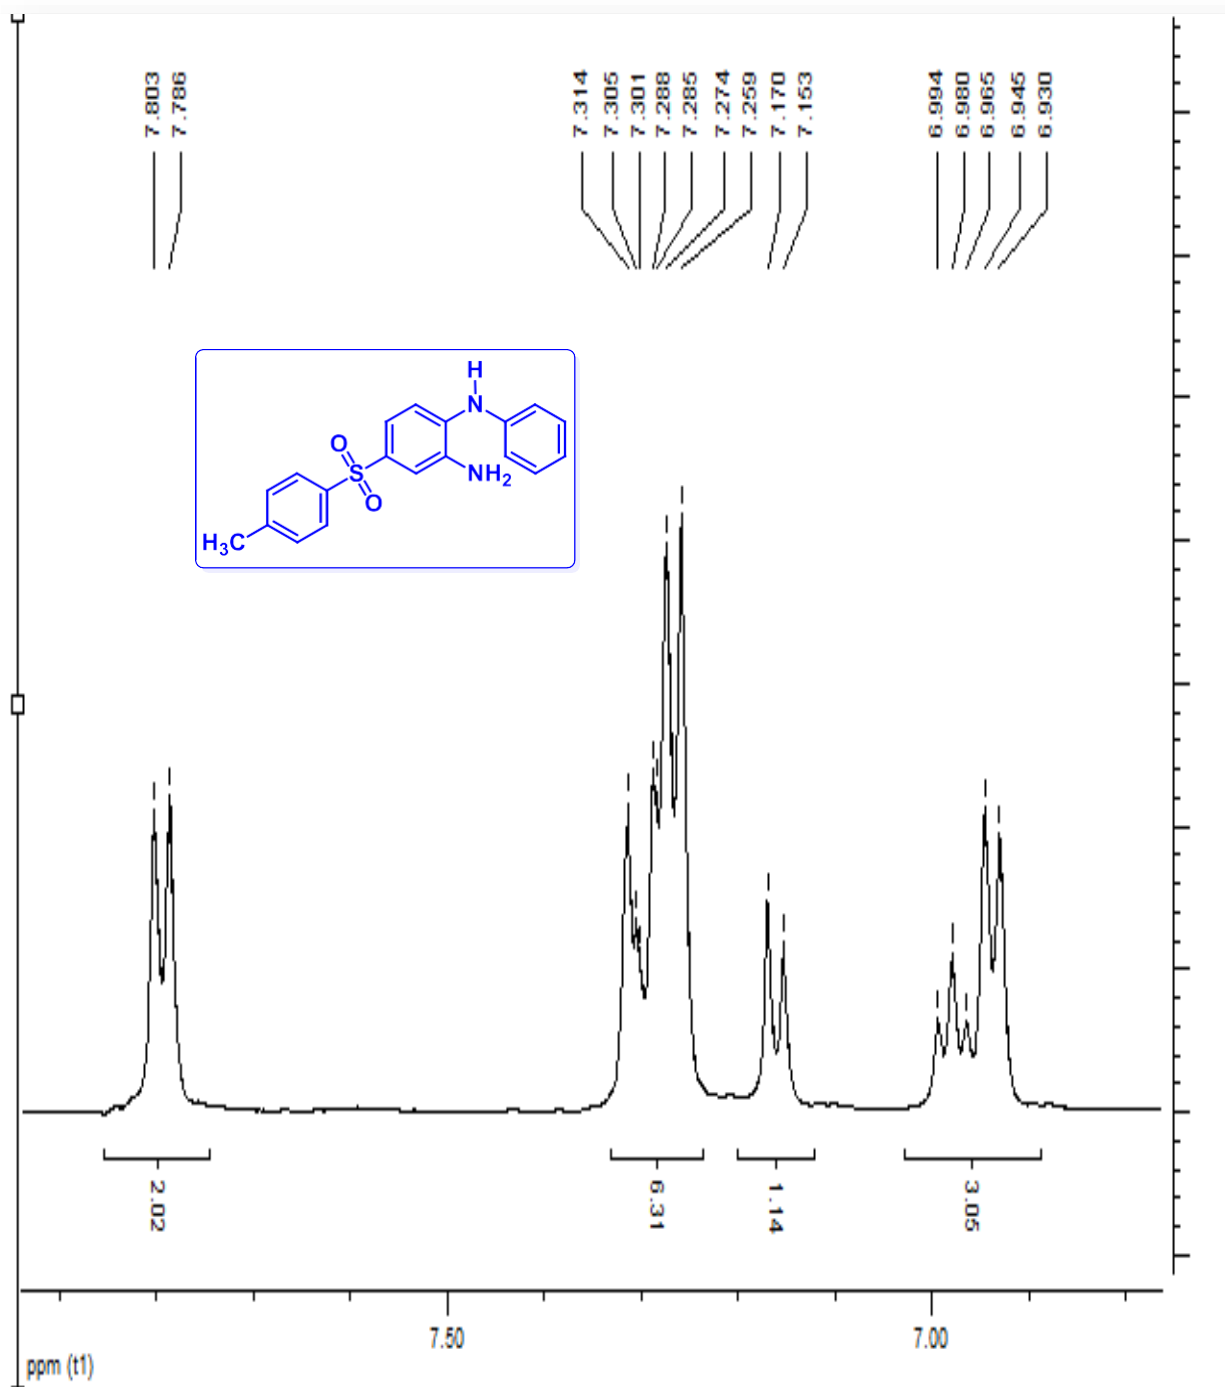



<sup>13</sup>C NMR spectrum of 3b

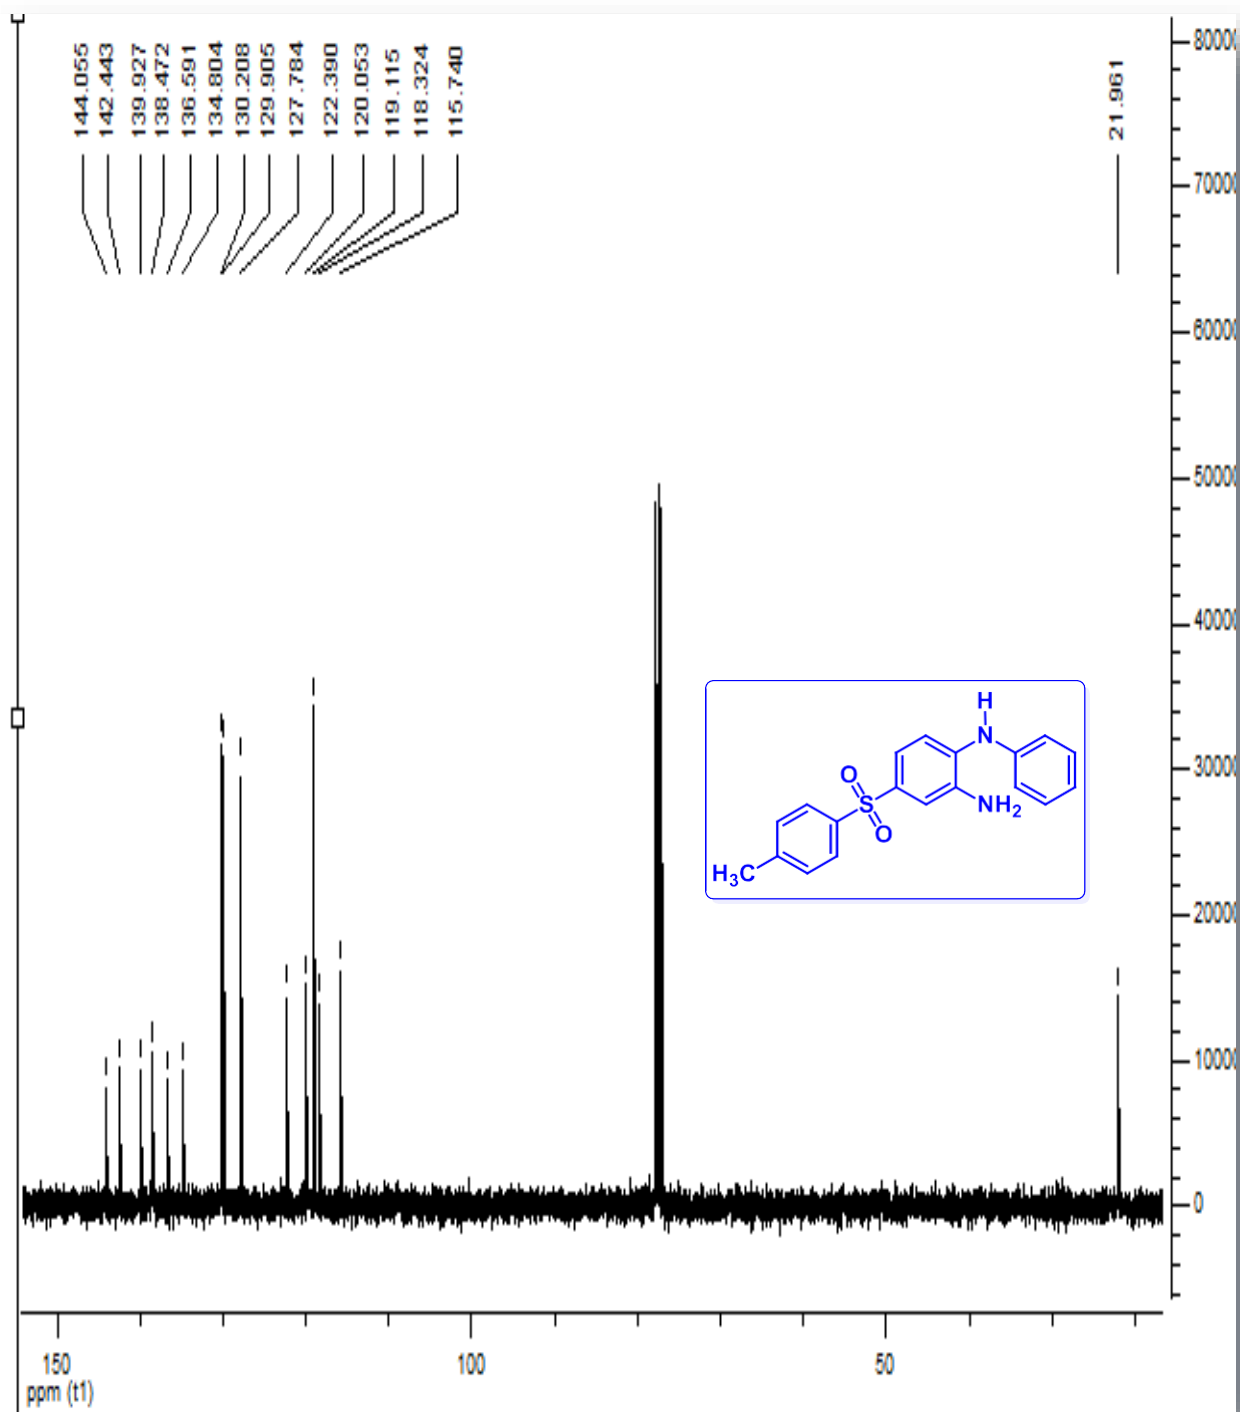

### Expanded $^{13}\text{C}$ NMR spectrum of 3b

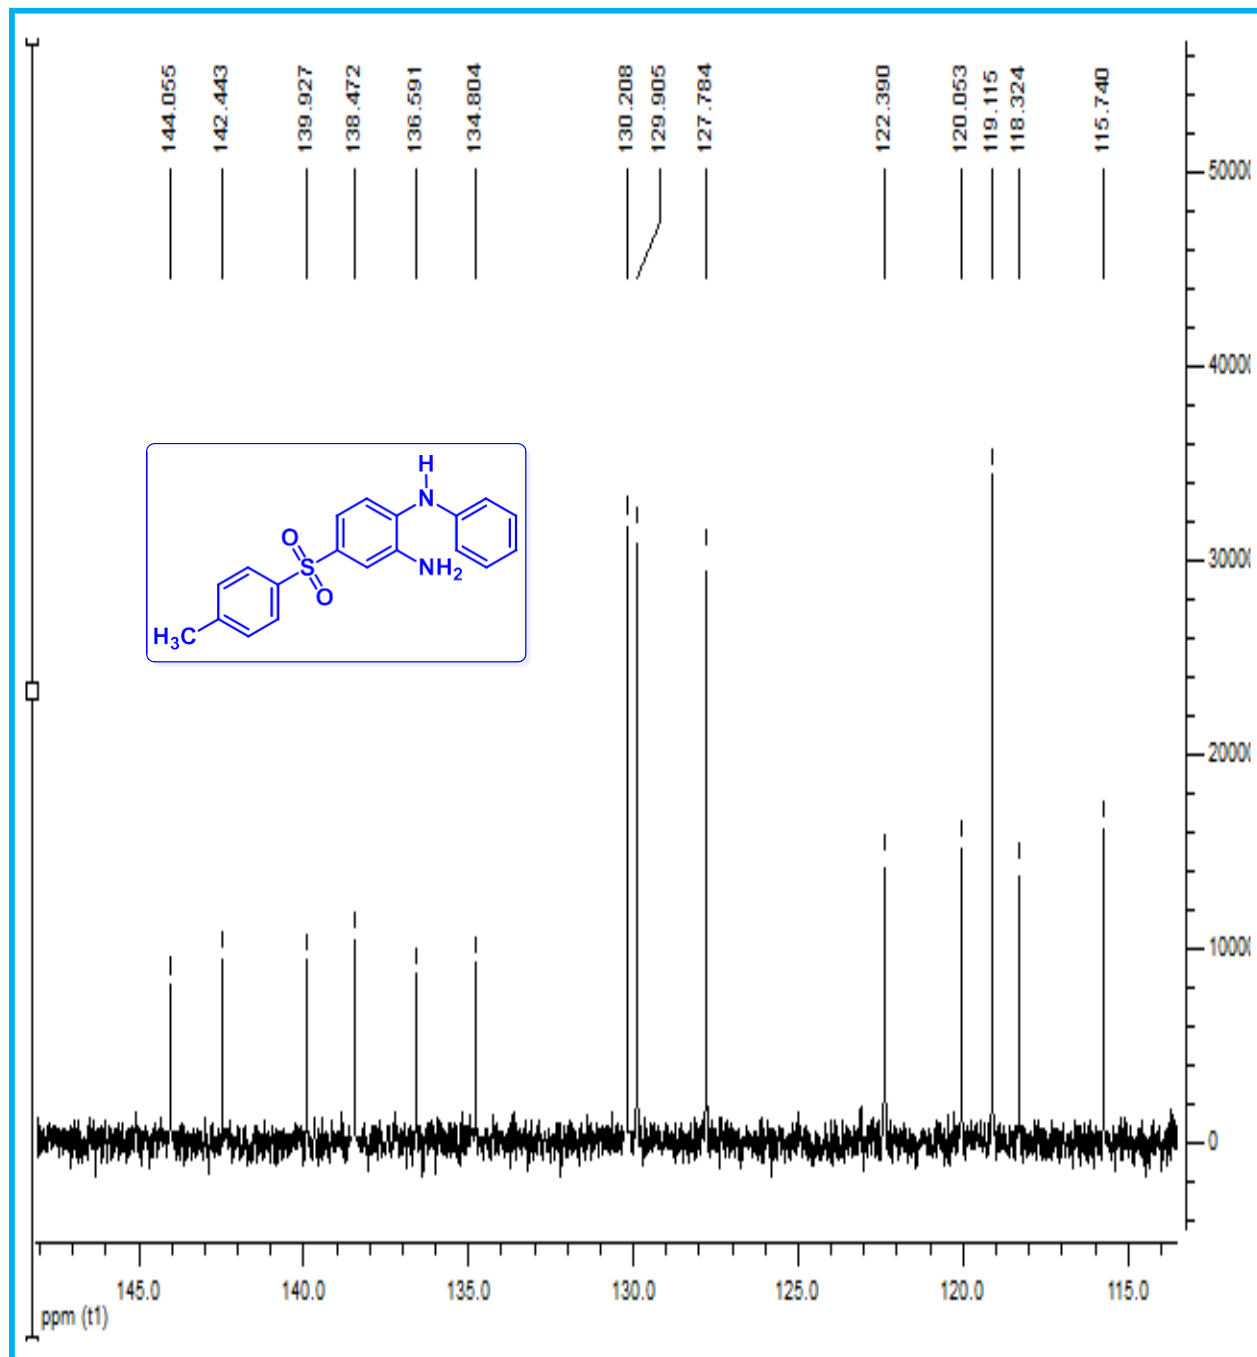

# MS spectrum of 3b

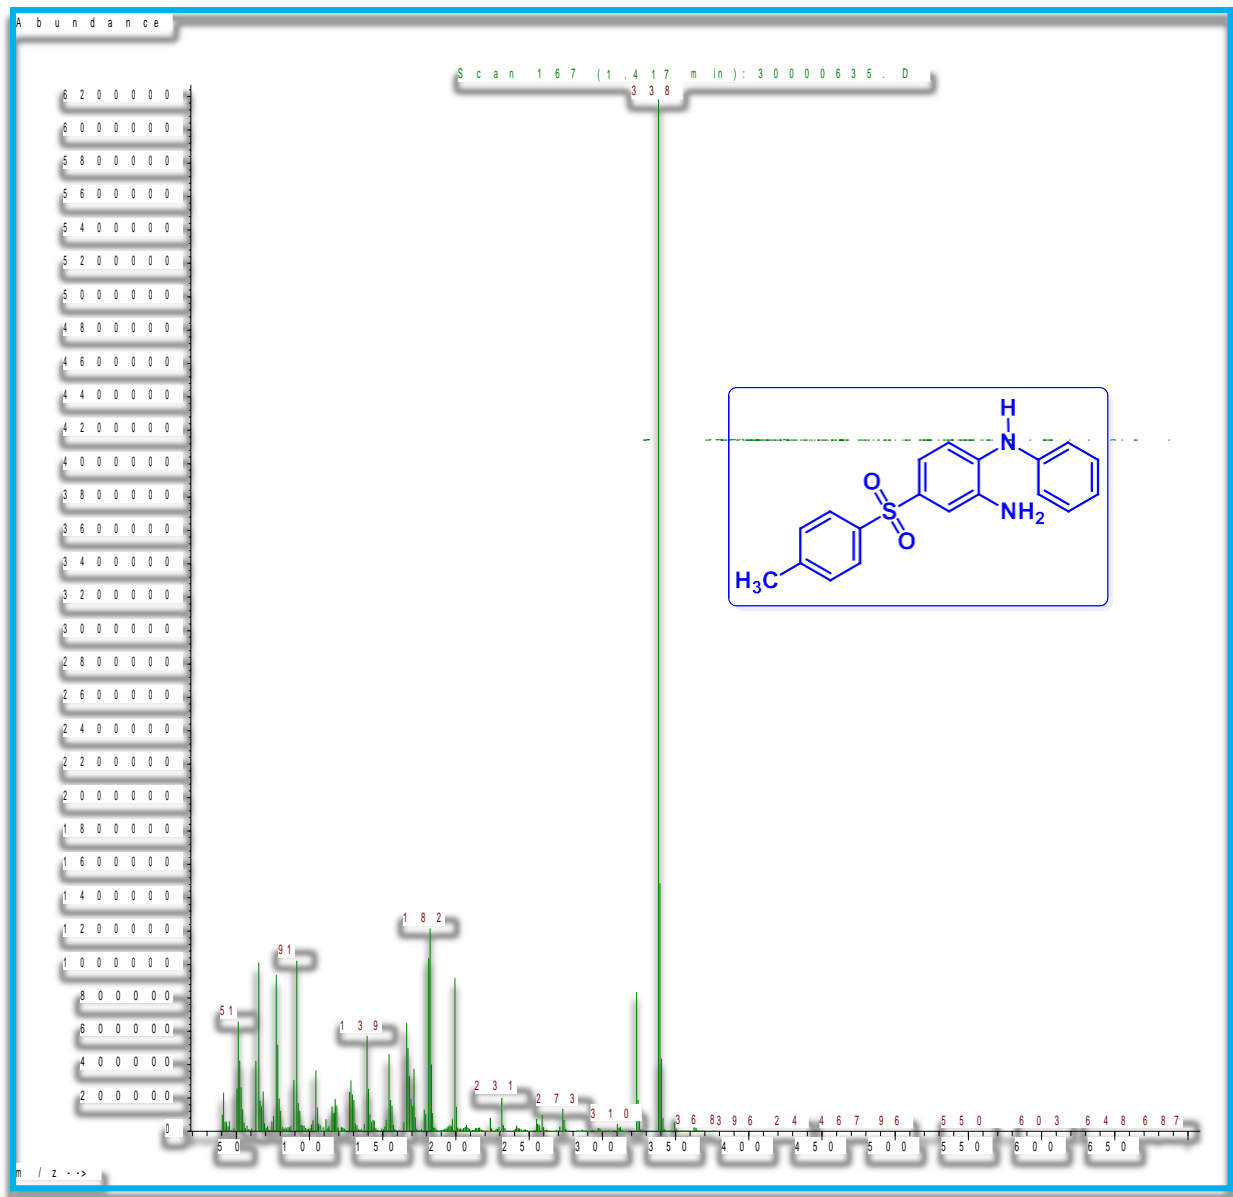

FT-IR spectrum of 3b

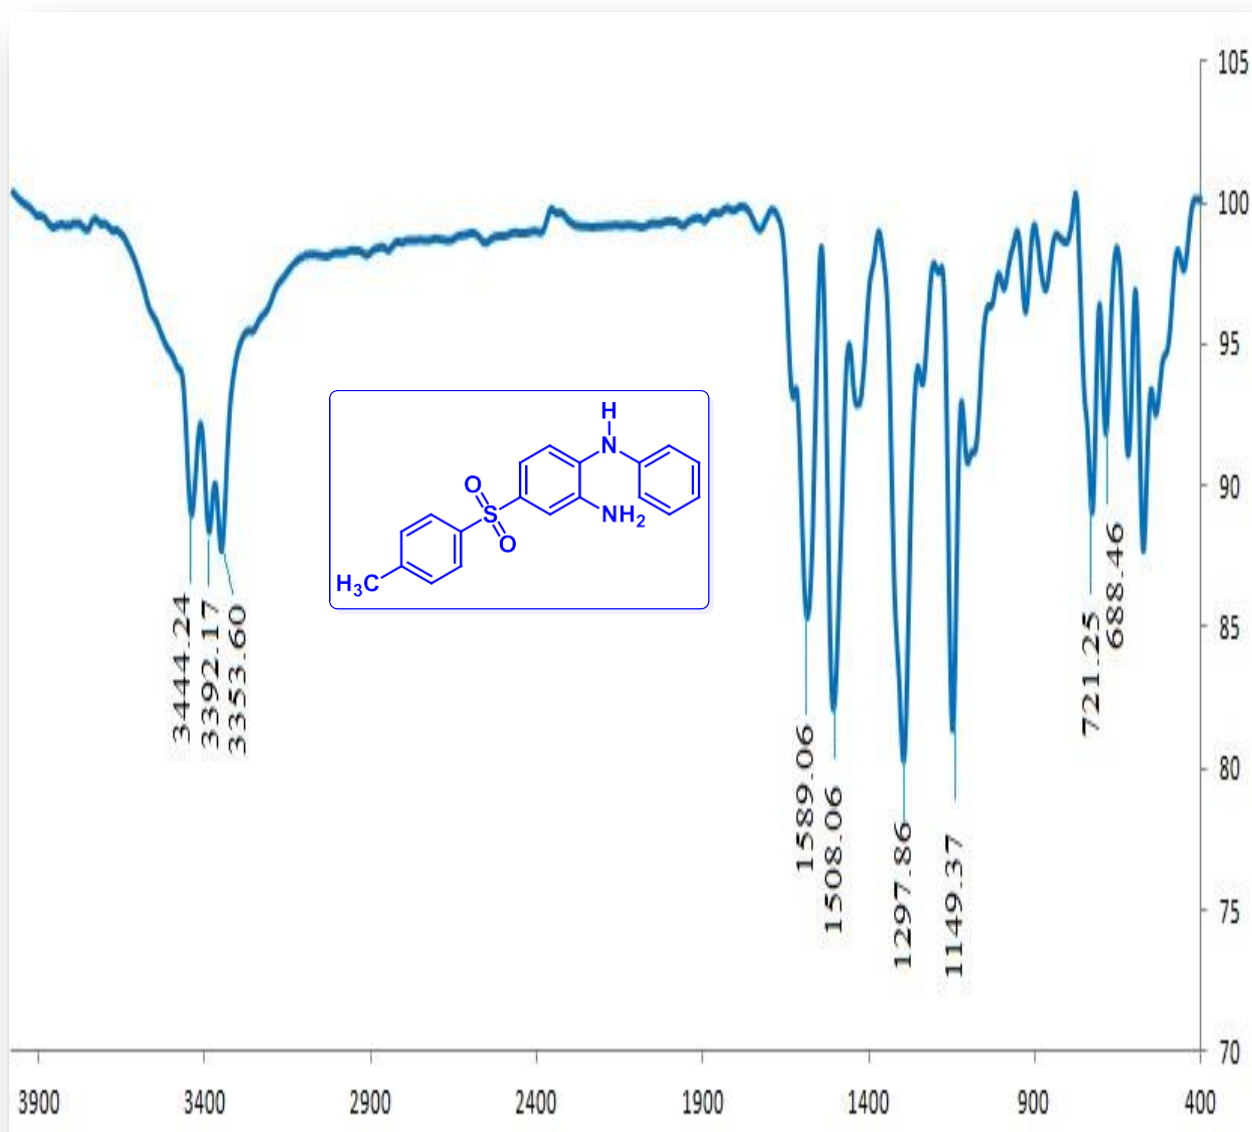

<sup>1</sup>H NMR spectrum of 3c

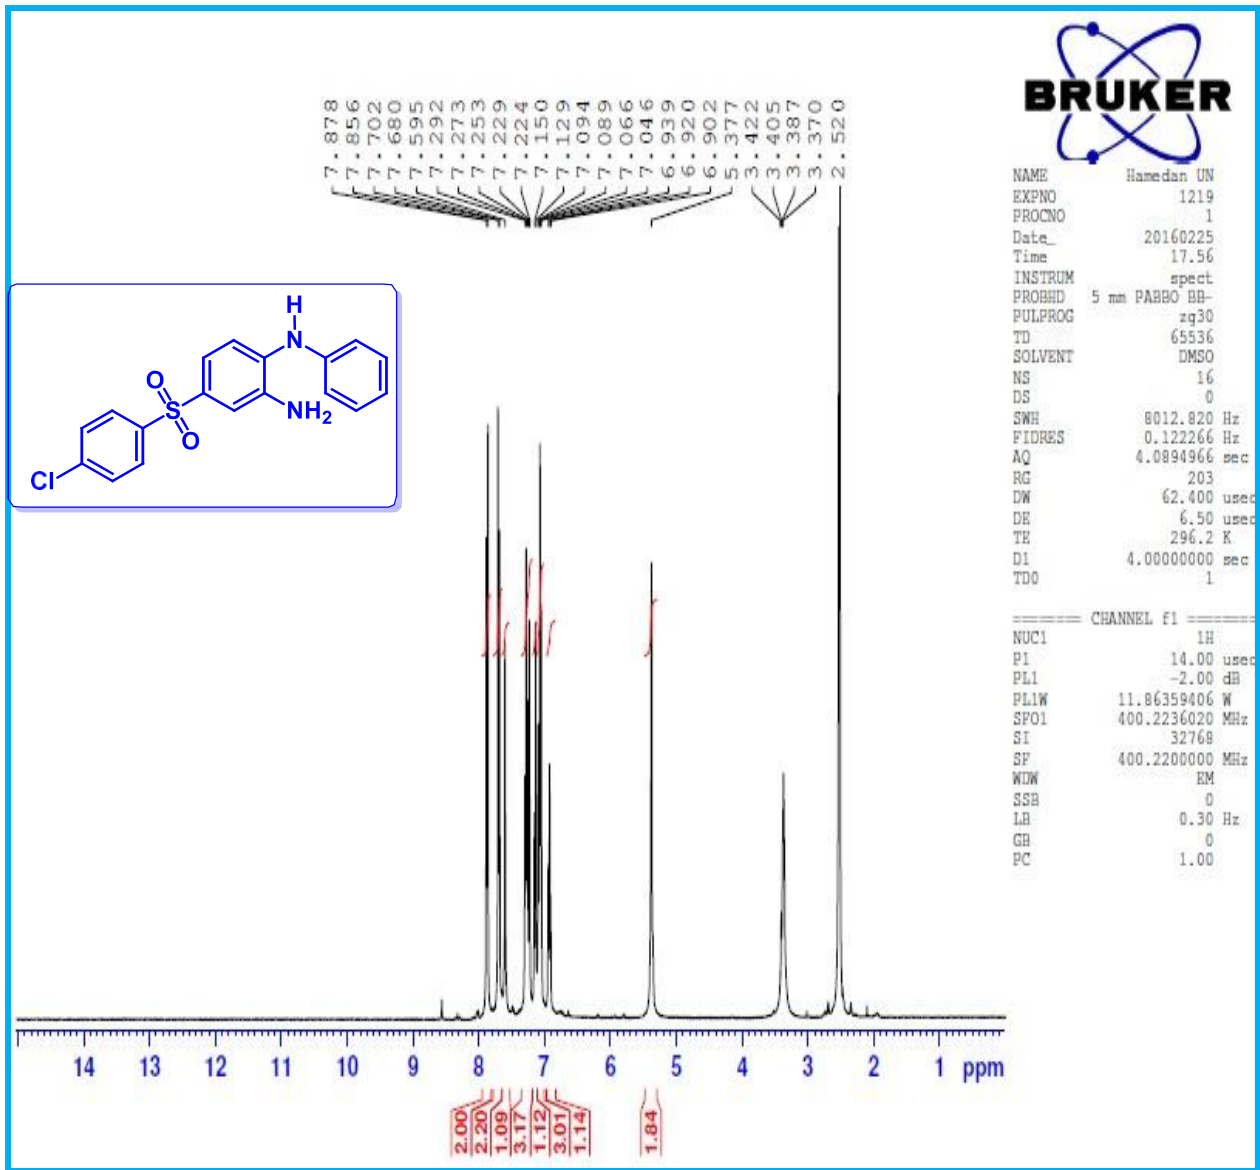

Expanded <sup>1</sup>H NMR spectrum of 3c

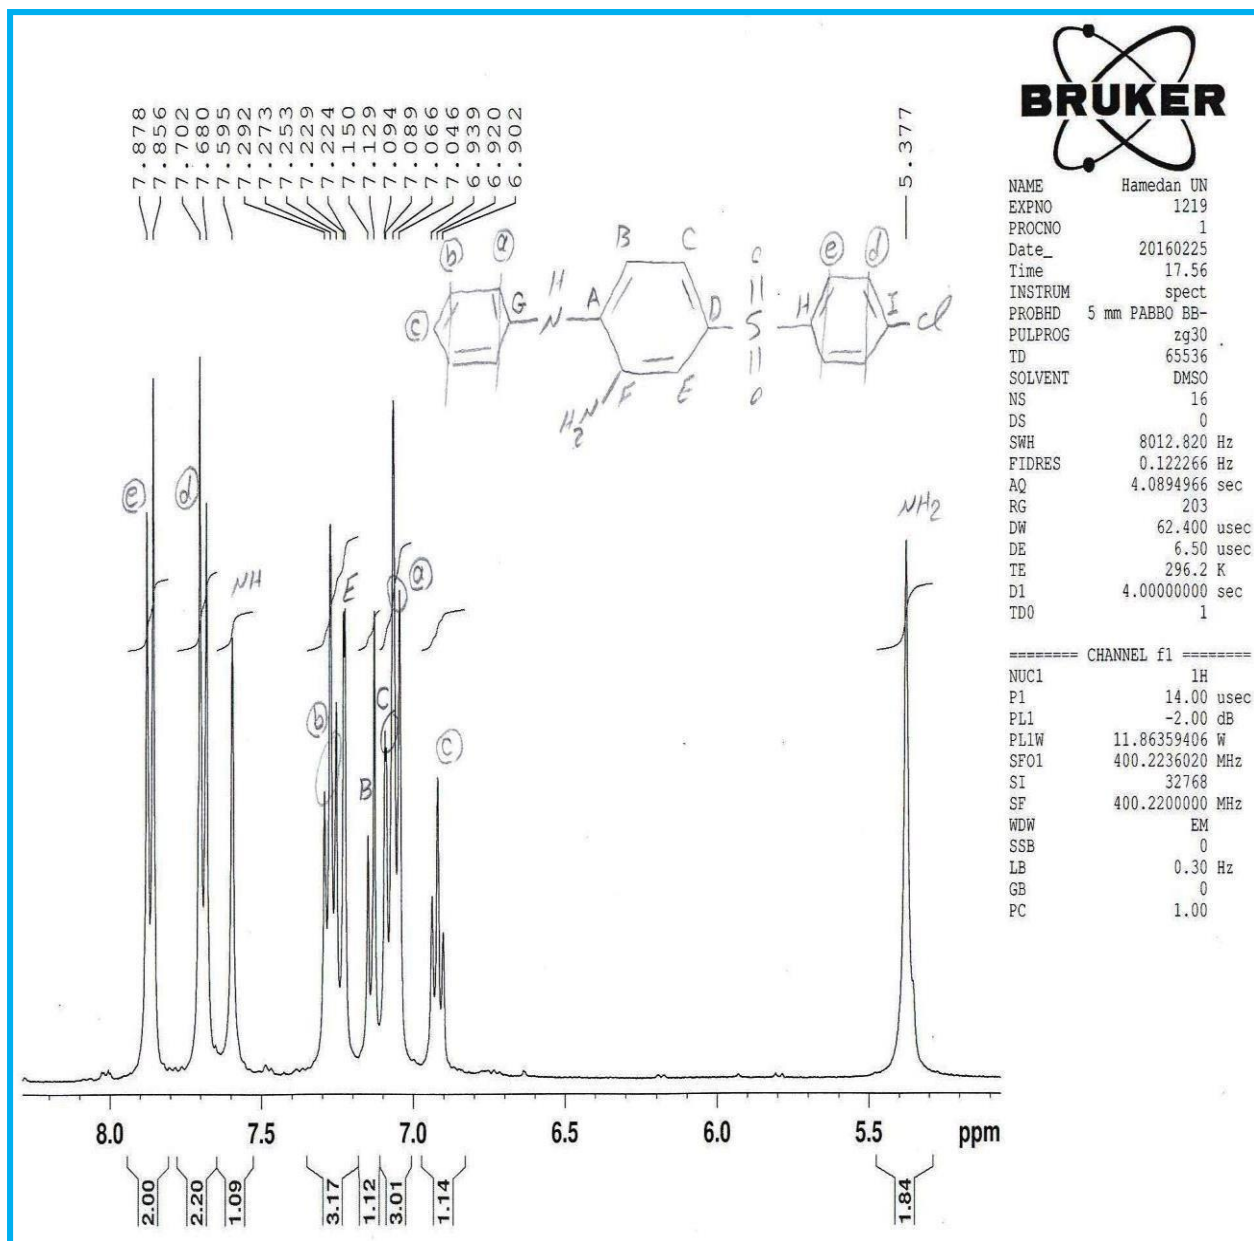

<sup>13</sup>C NMR spectrum of 3c

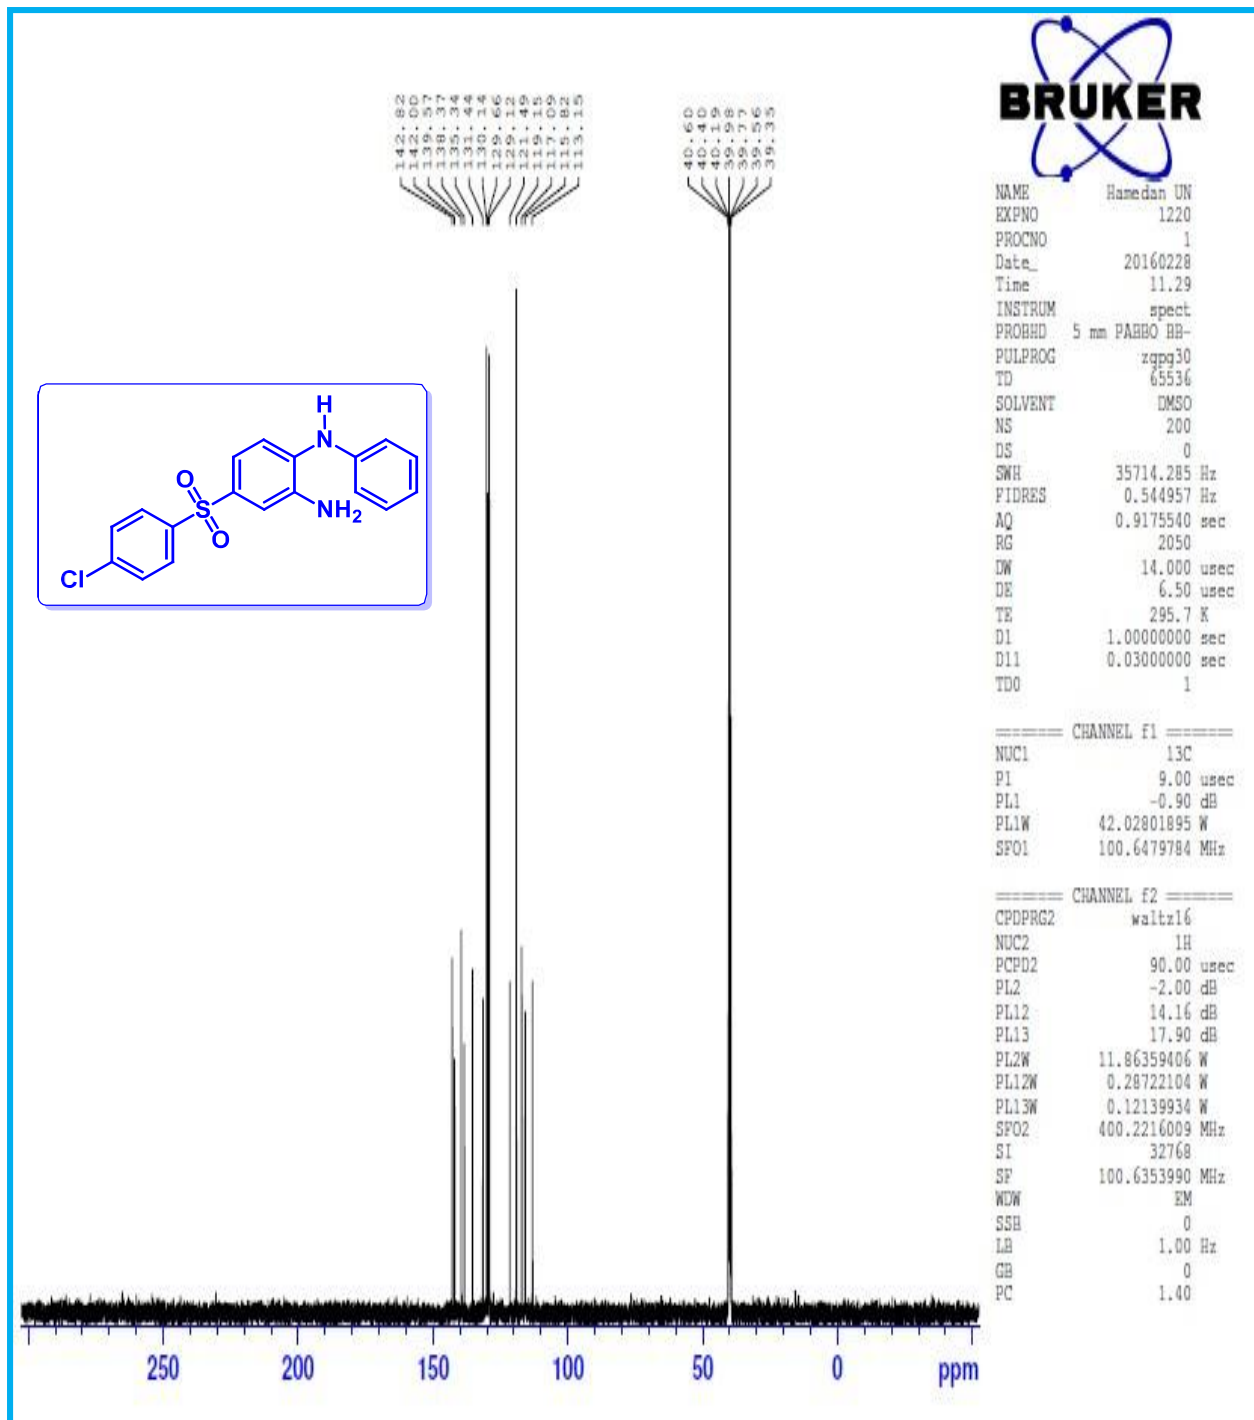

Expanded <sup>13</sup>C NMR spectrum of 3c

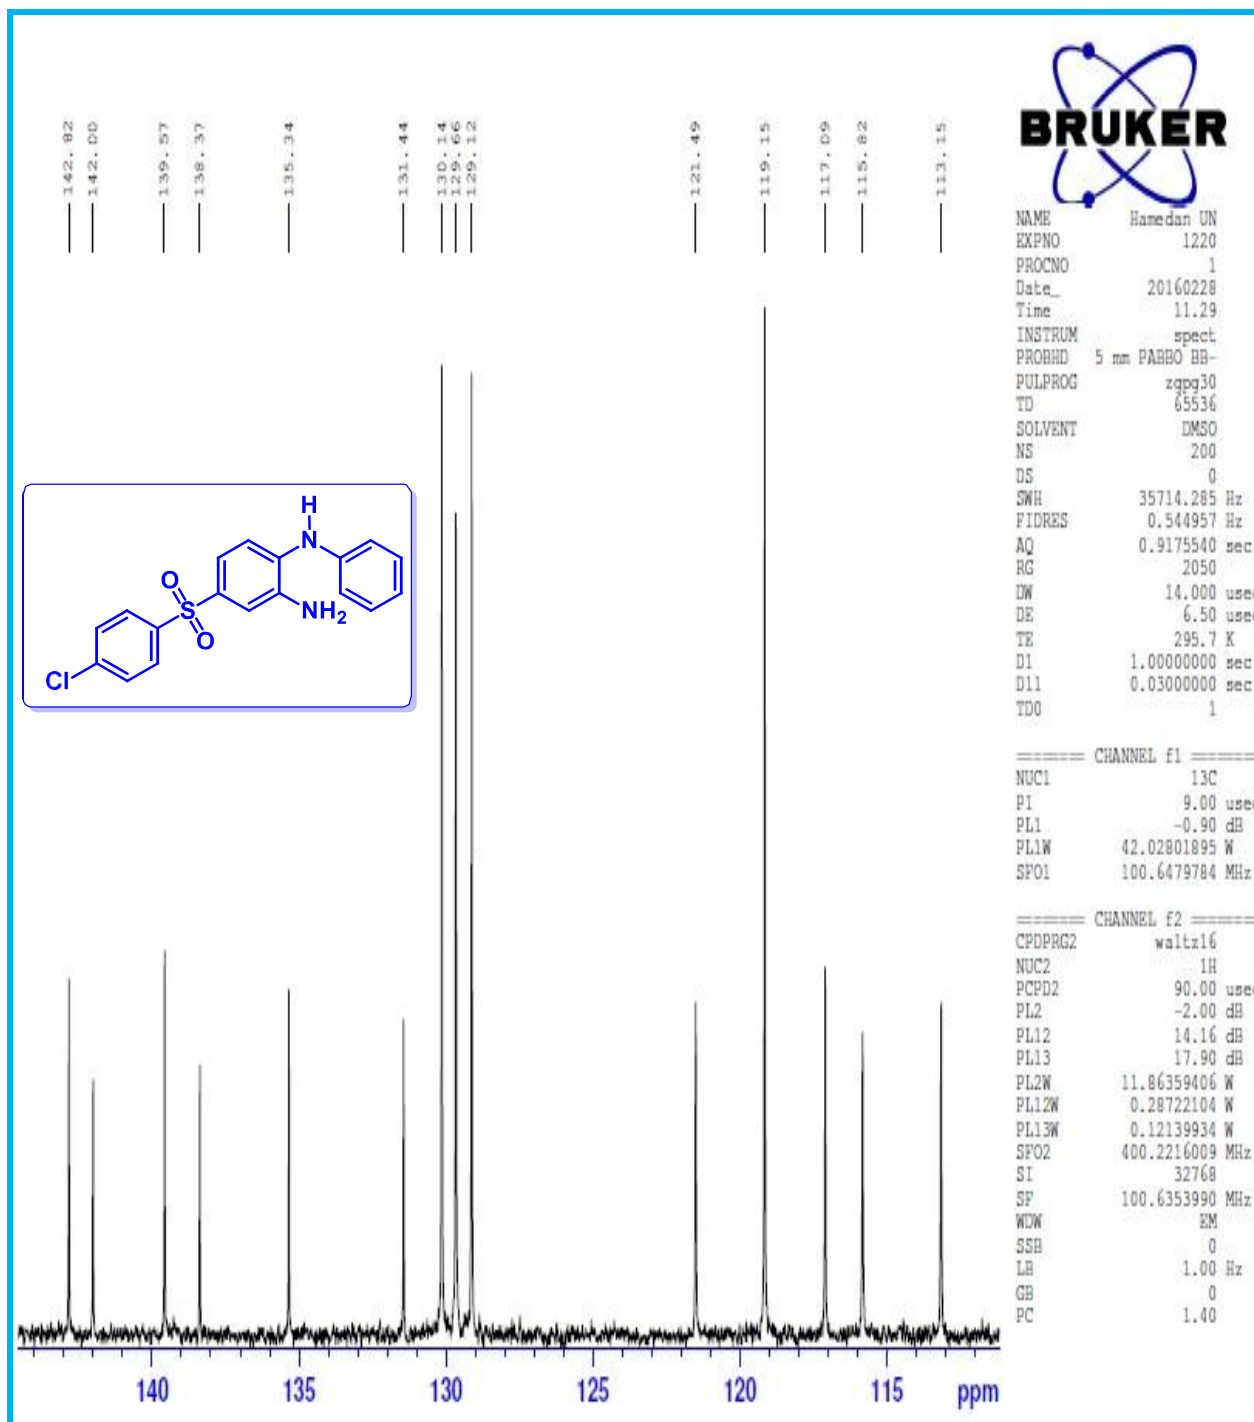



<sup>13</sup>C-DEPT-135 spectrum of 3c

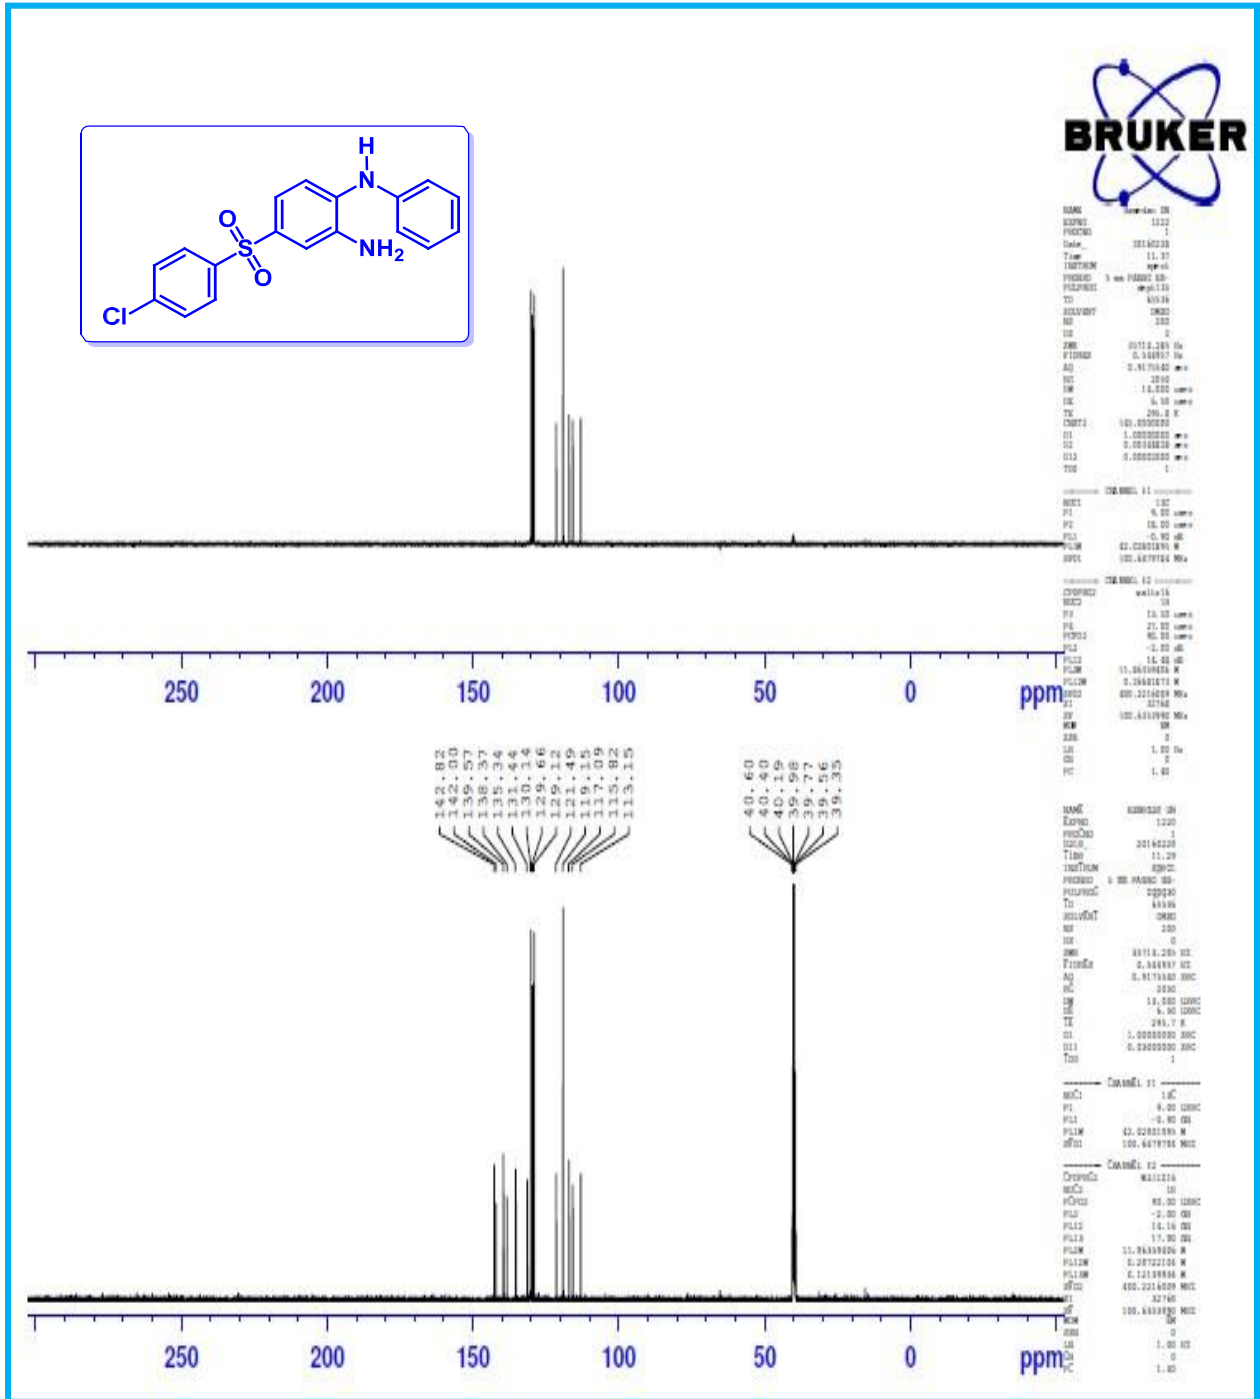

<sup>13</sup>C –DEPT-135 expanded spectrum of 3c

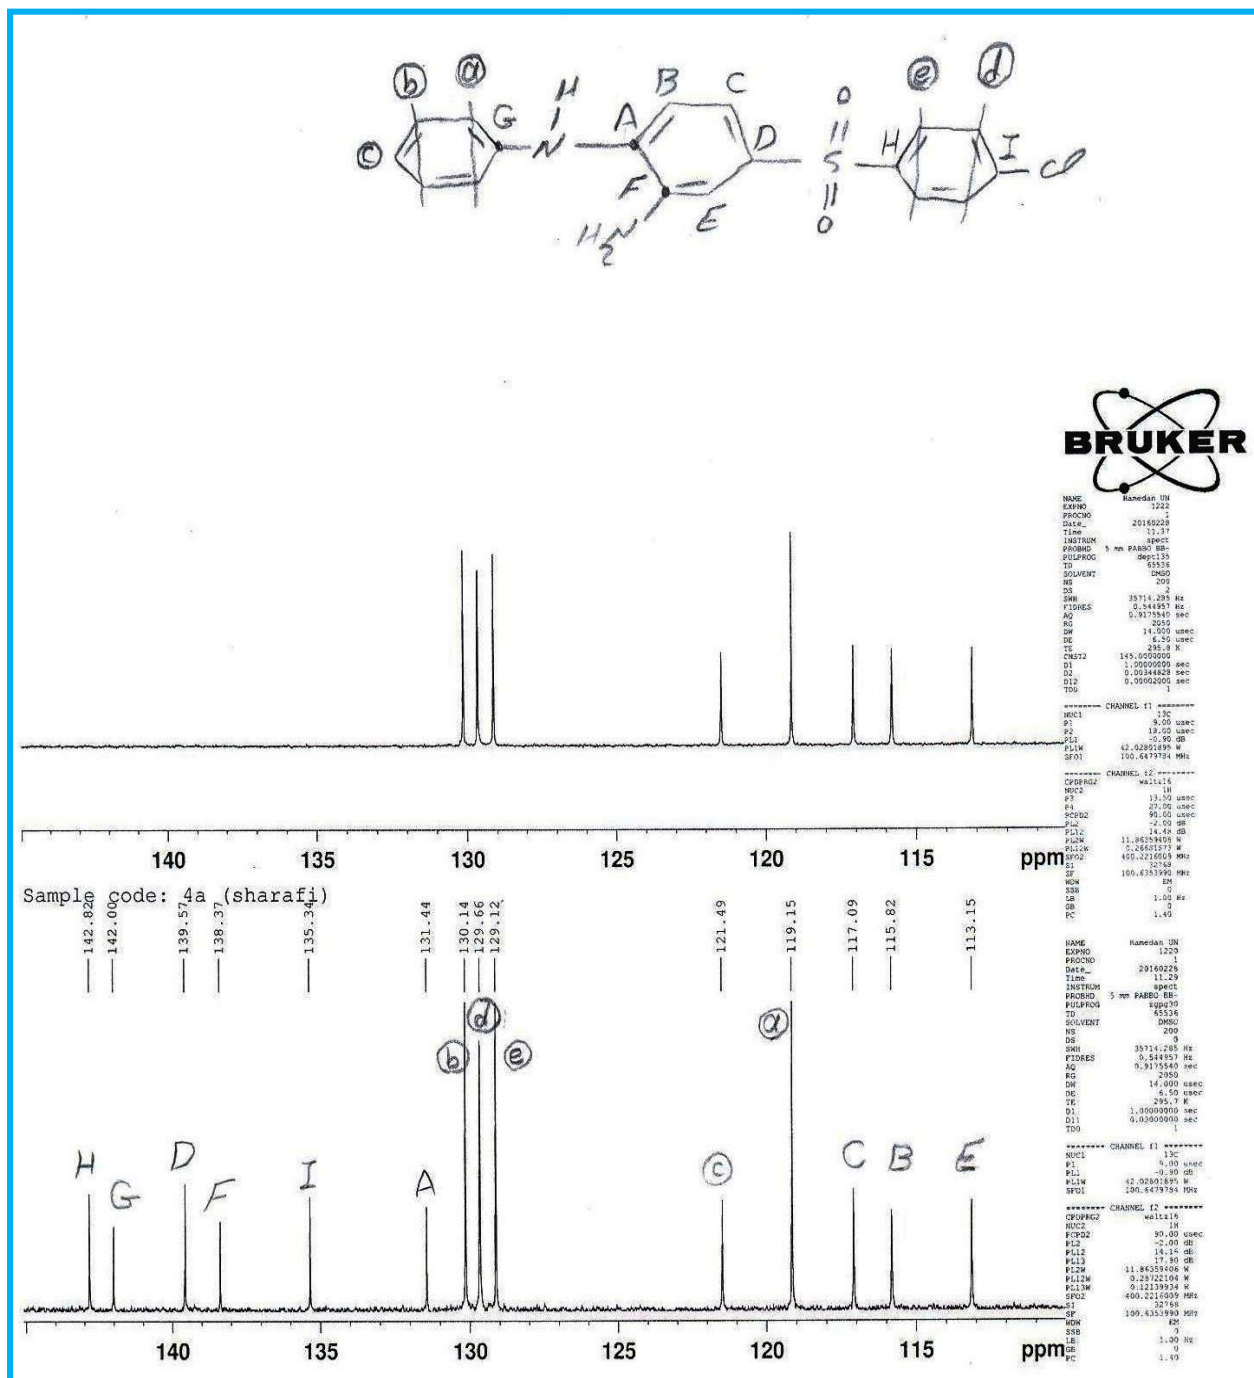

2D HMBC (F1 :  $^{13}\text{C}$ , F2 :  $^1\text{H}$ ) spectrum of 3c

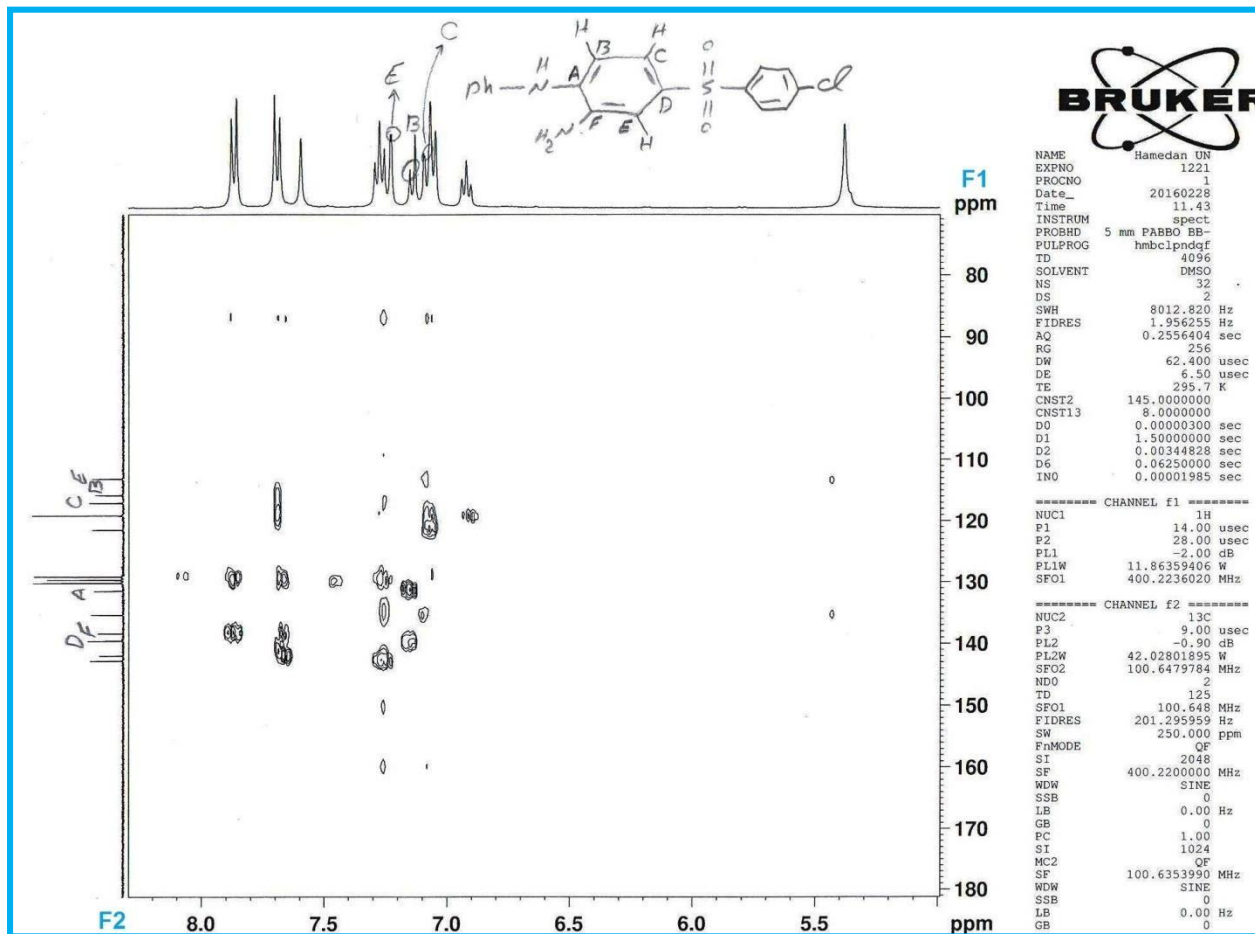

2D HMBC (F1 :  $^{13}\text{C}$ , F2 :  $^1\text{H}$ ) expanded spectrum of 3c

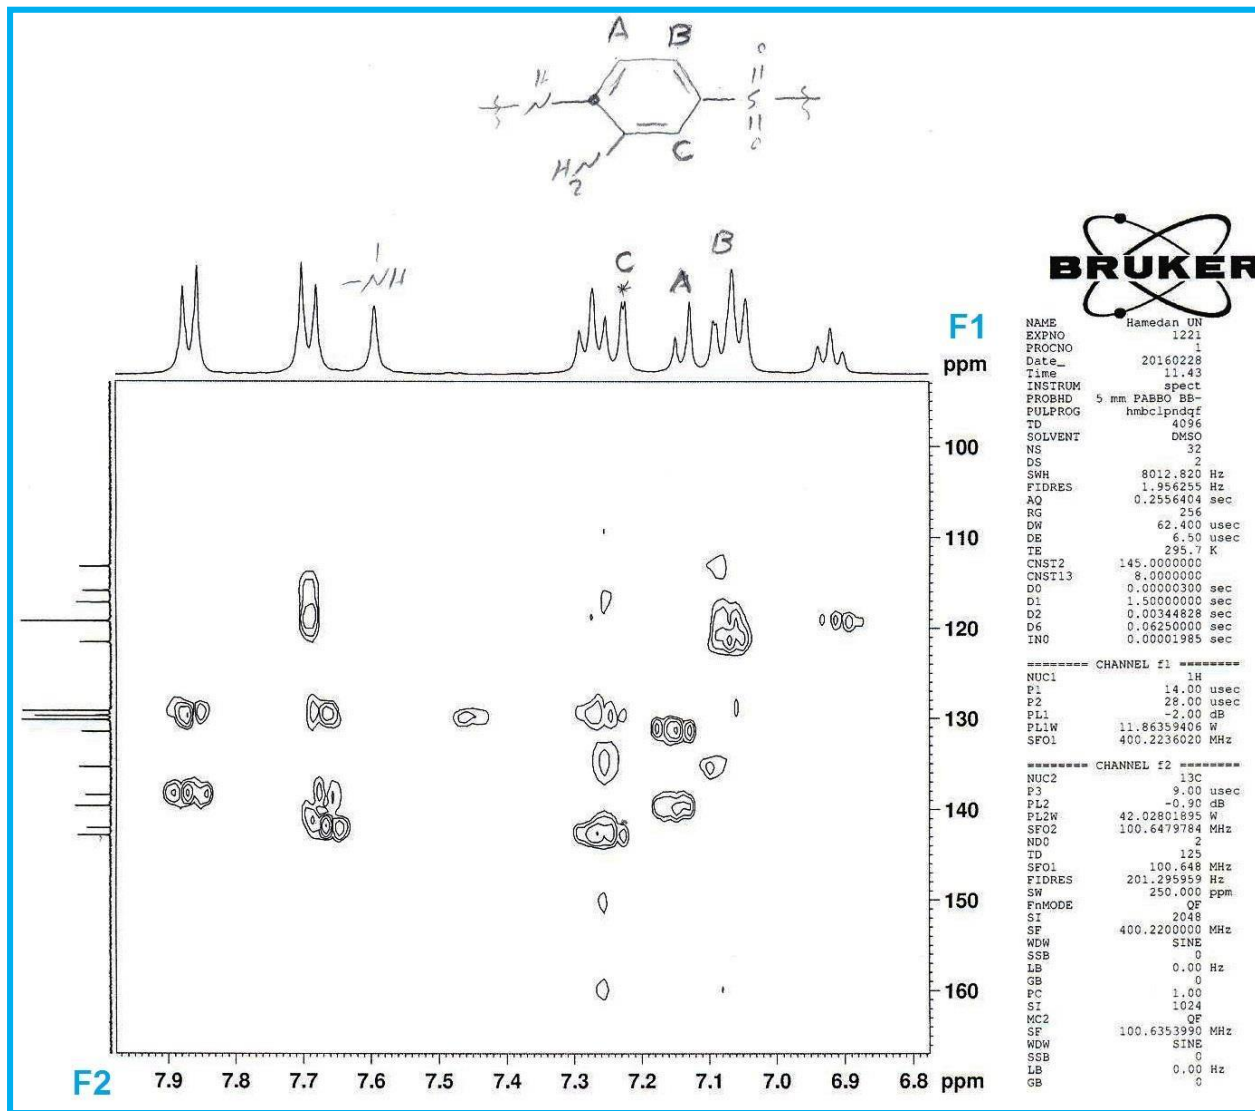

2D <sup>1</sup>HSQC(F1 : <sup>1</sup>H, F2 : <sup>1</sup>H) spectrum of 3c

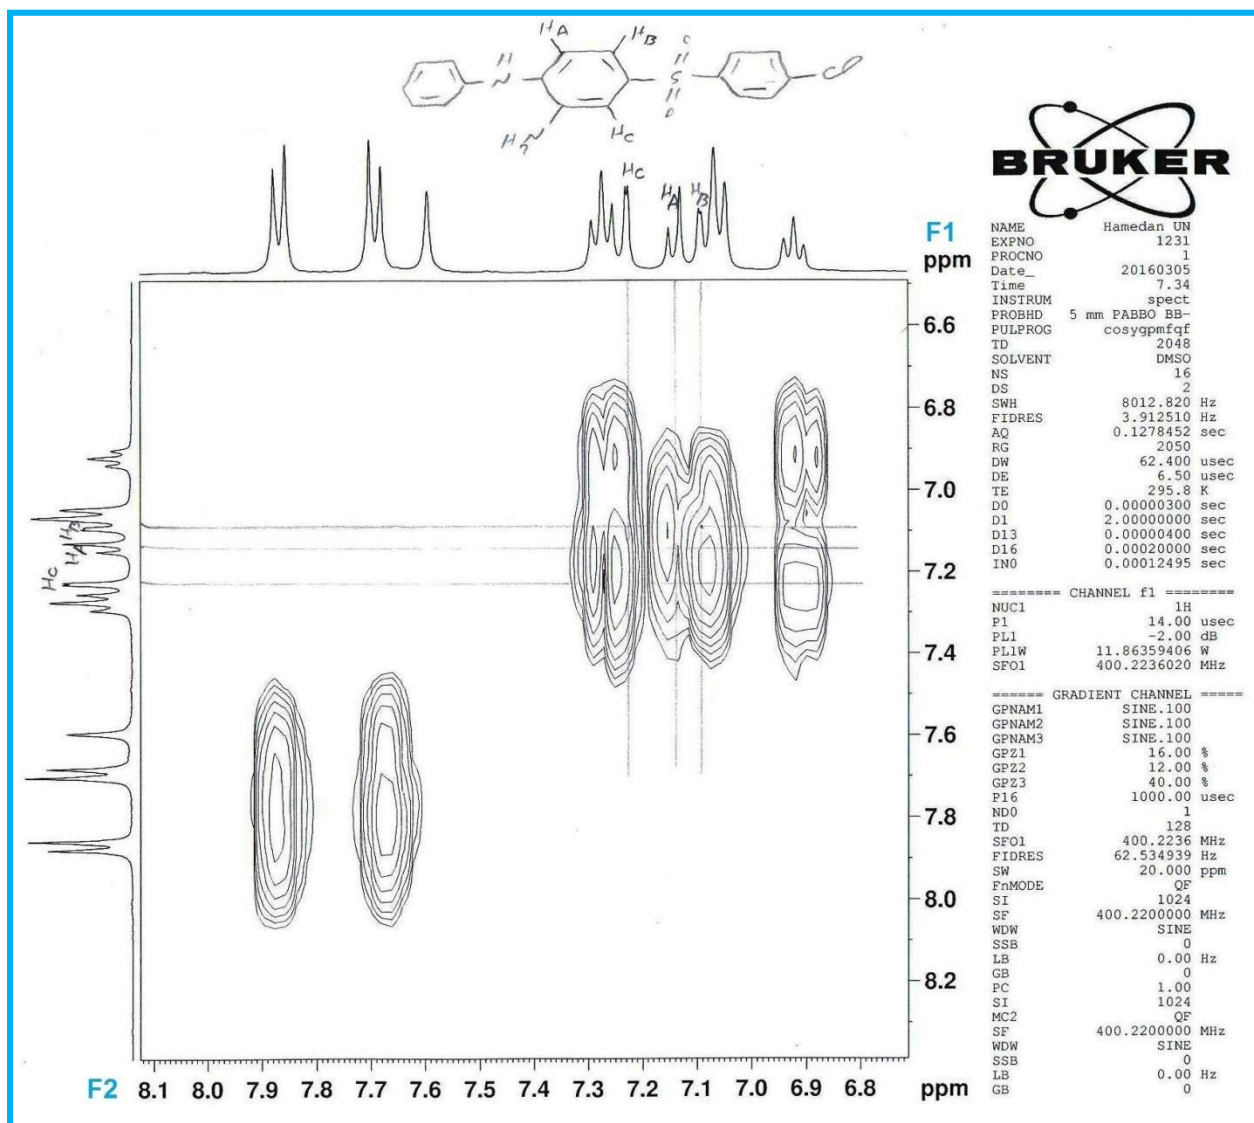

2D HSQC(F1 :  $^1\text{H}$ , F2 :  $^1\text{H}$ )expanded spectrum of 3c

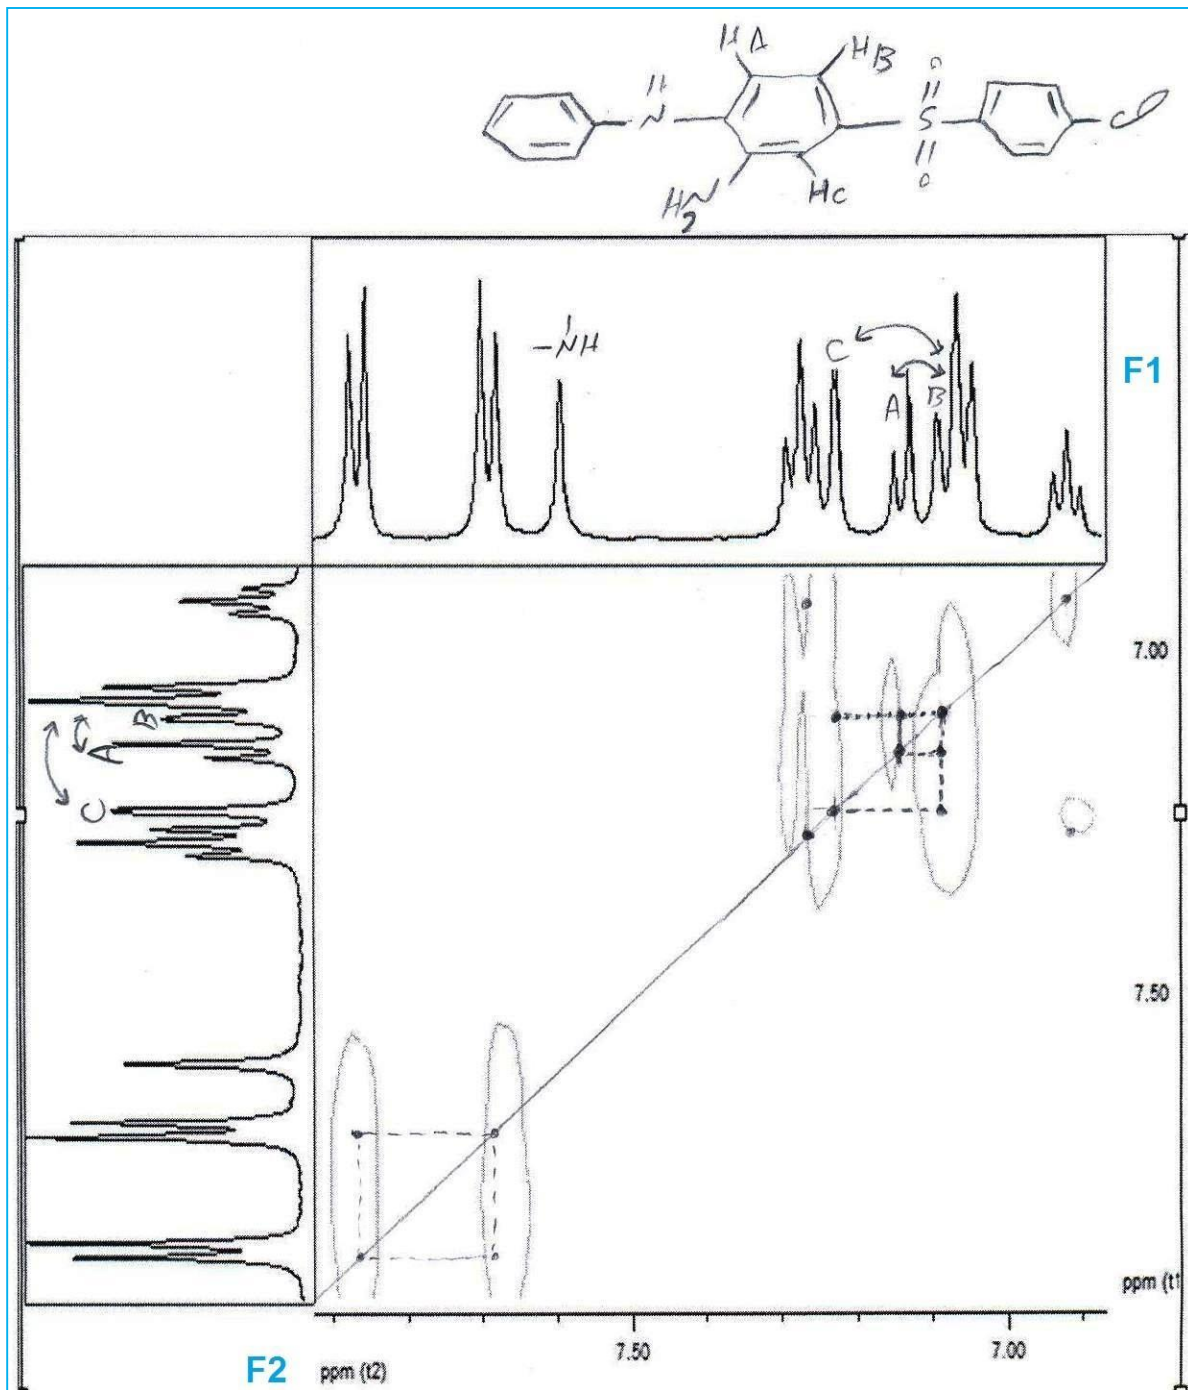



# MS spectrum of 3c

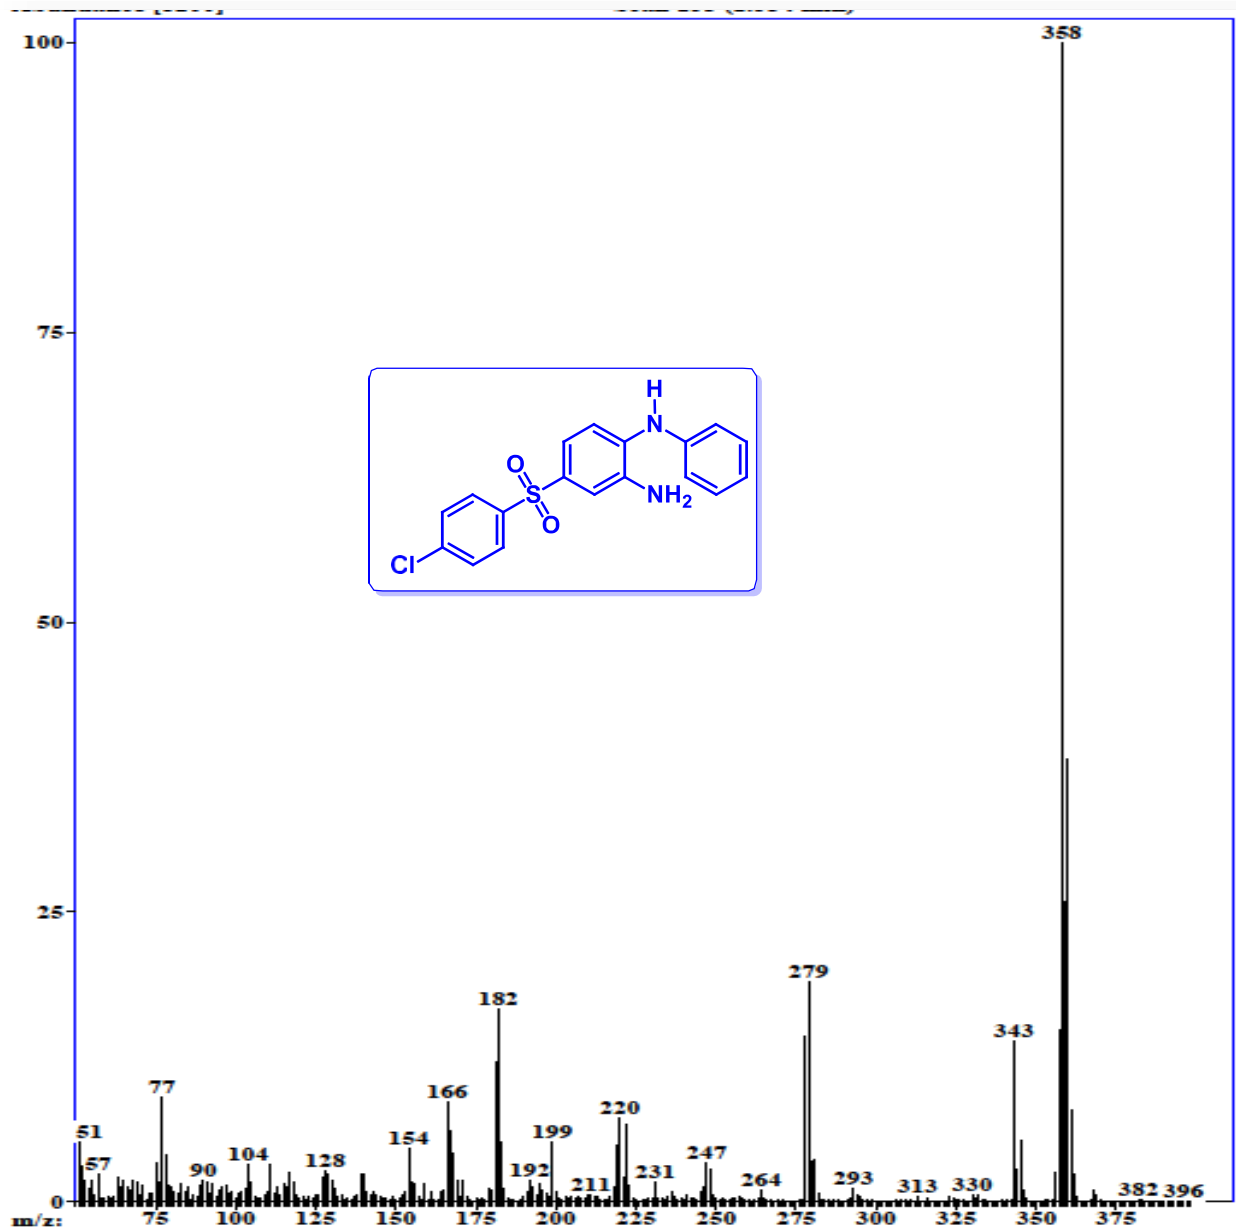

FT-IR spectrum of 3c

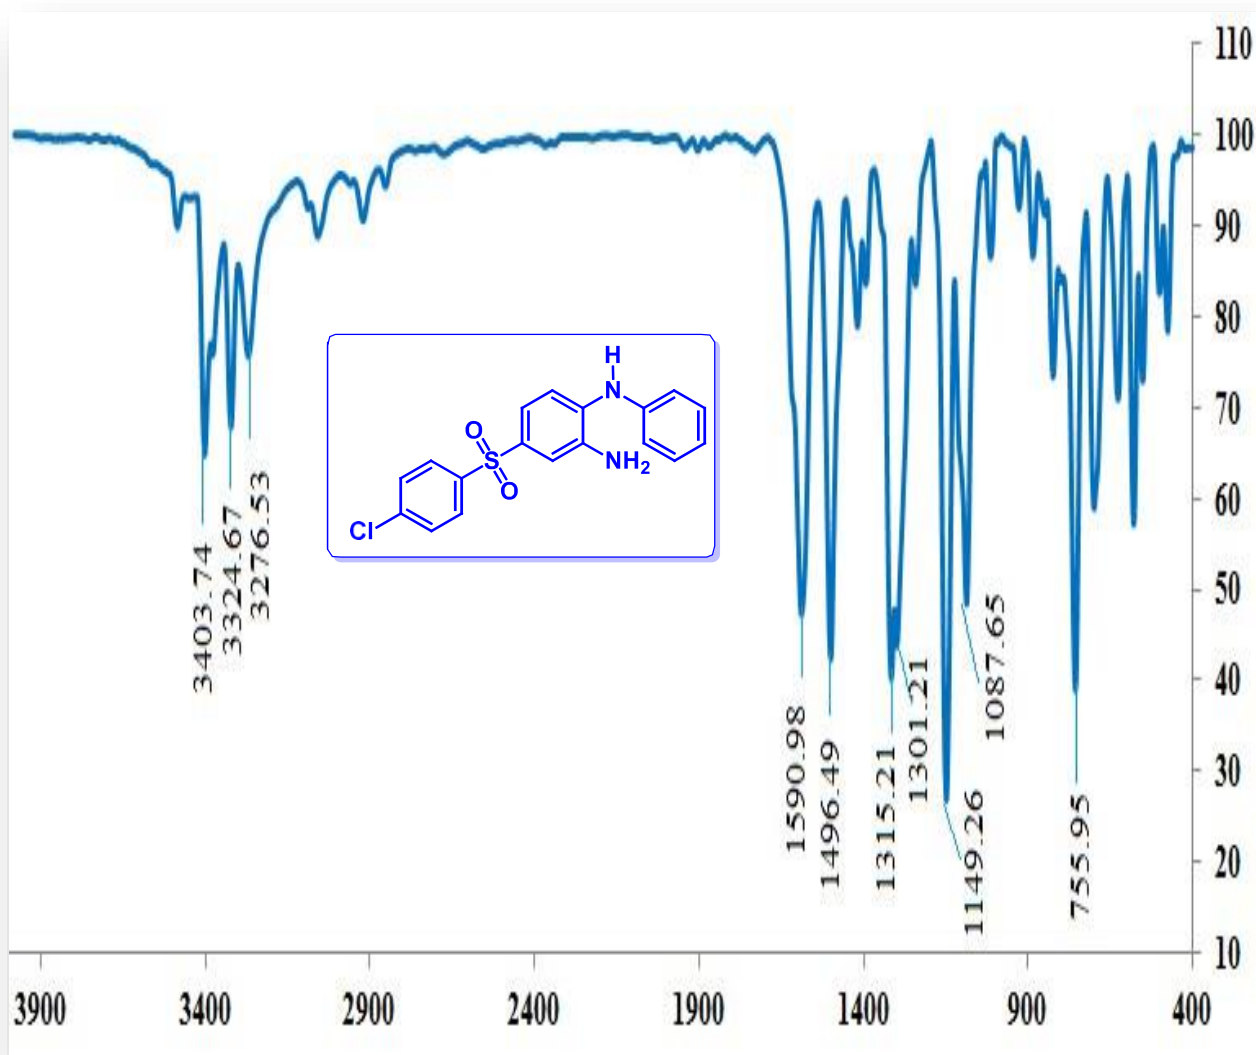



<sup>1</sup>H NMR spectrum of 3d

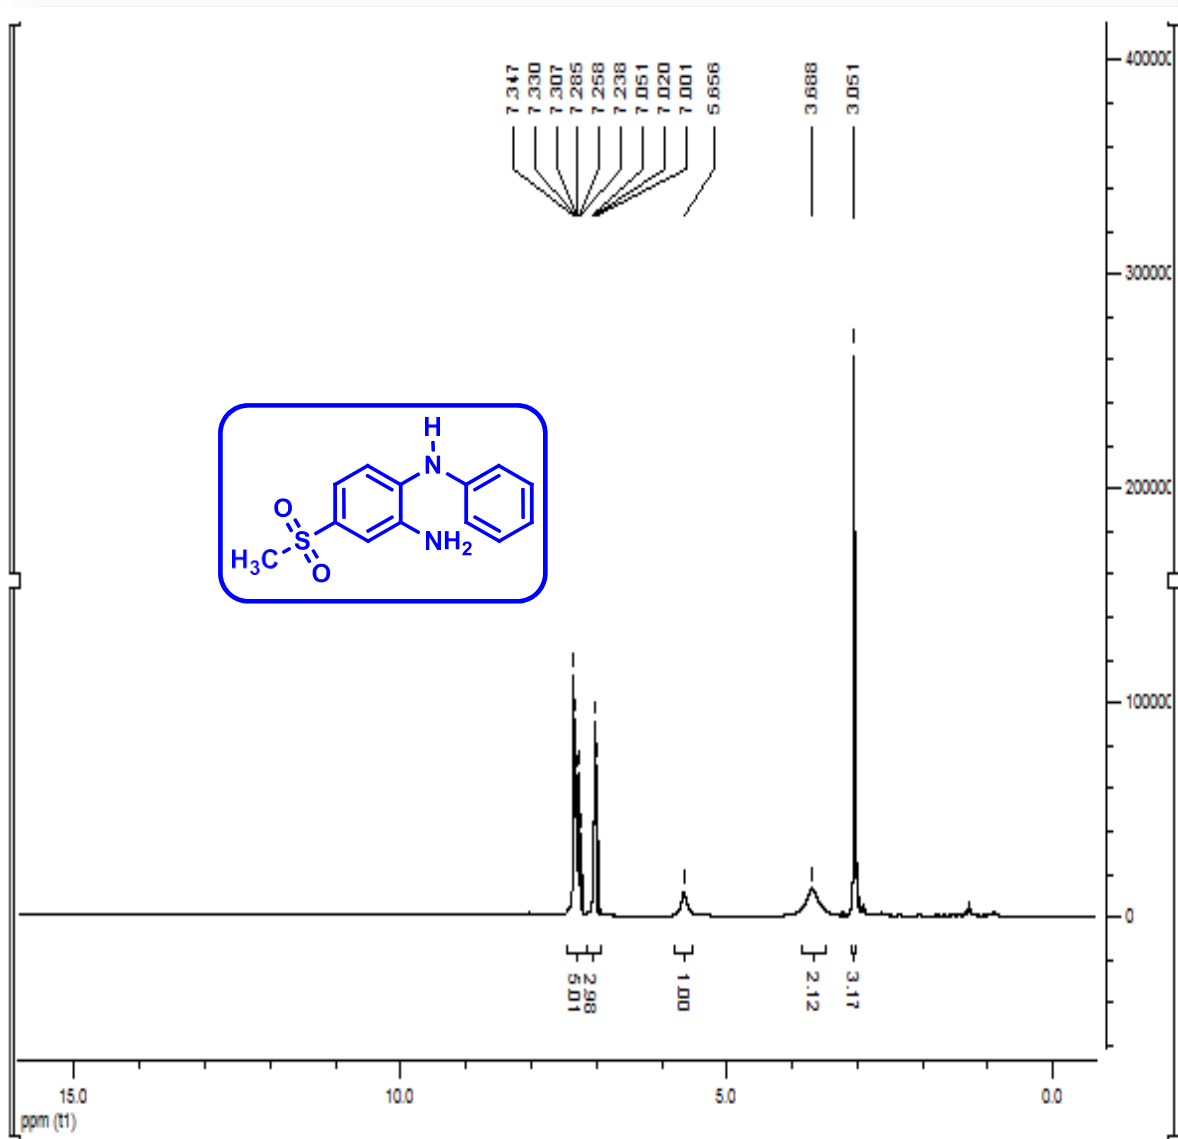

<sup>1</sup>H NMR spectrum in D<sub>2</sub>O of 3d

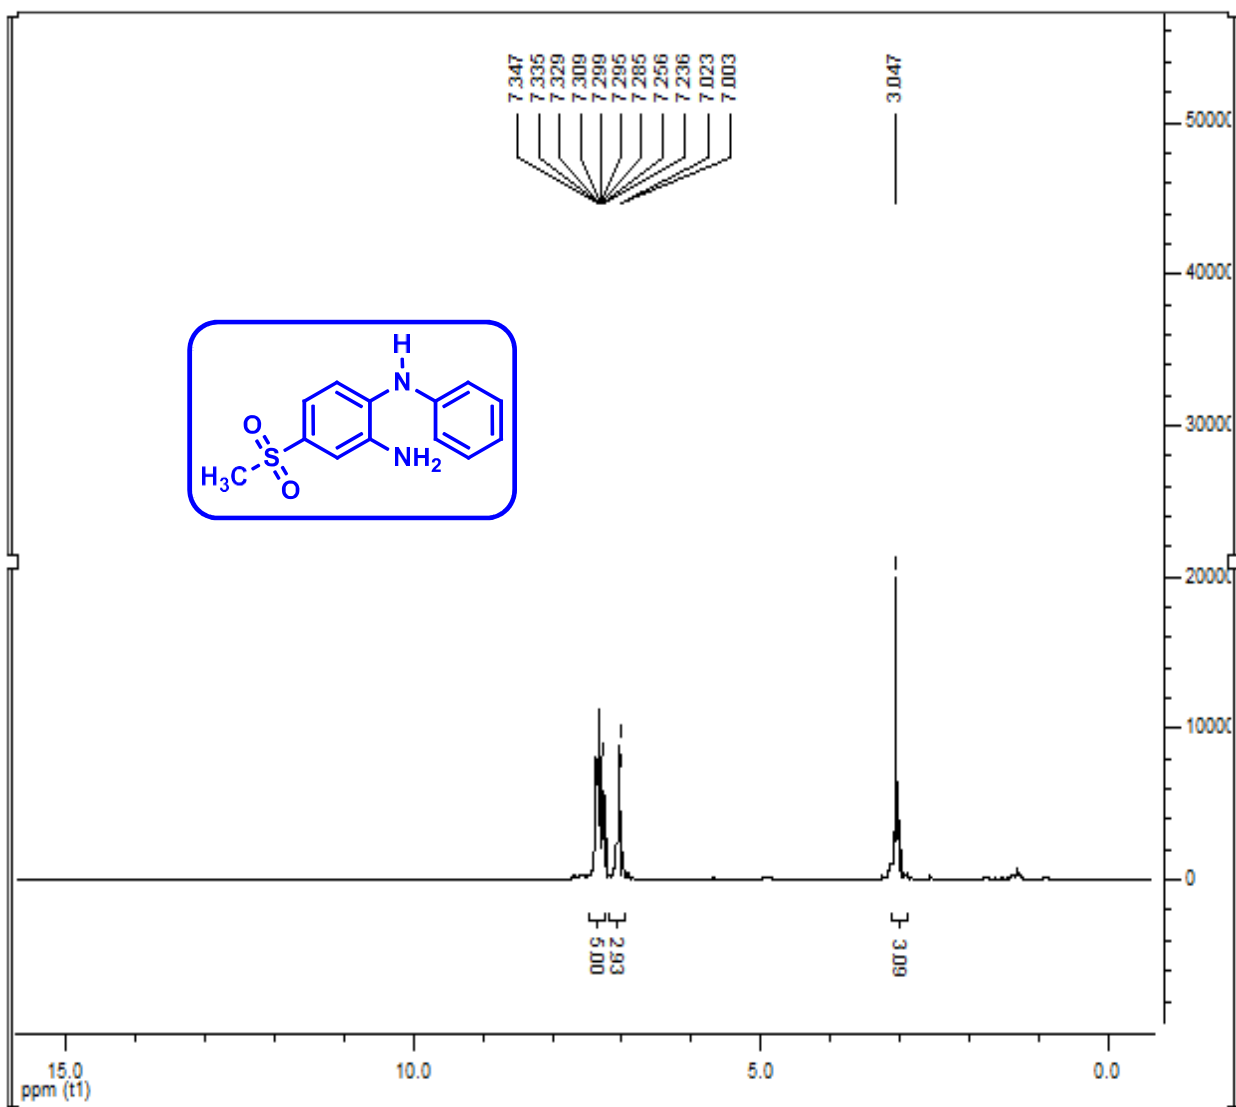

<sup>13</sup>C NMR spectrum of 3d

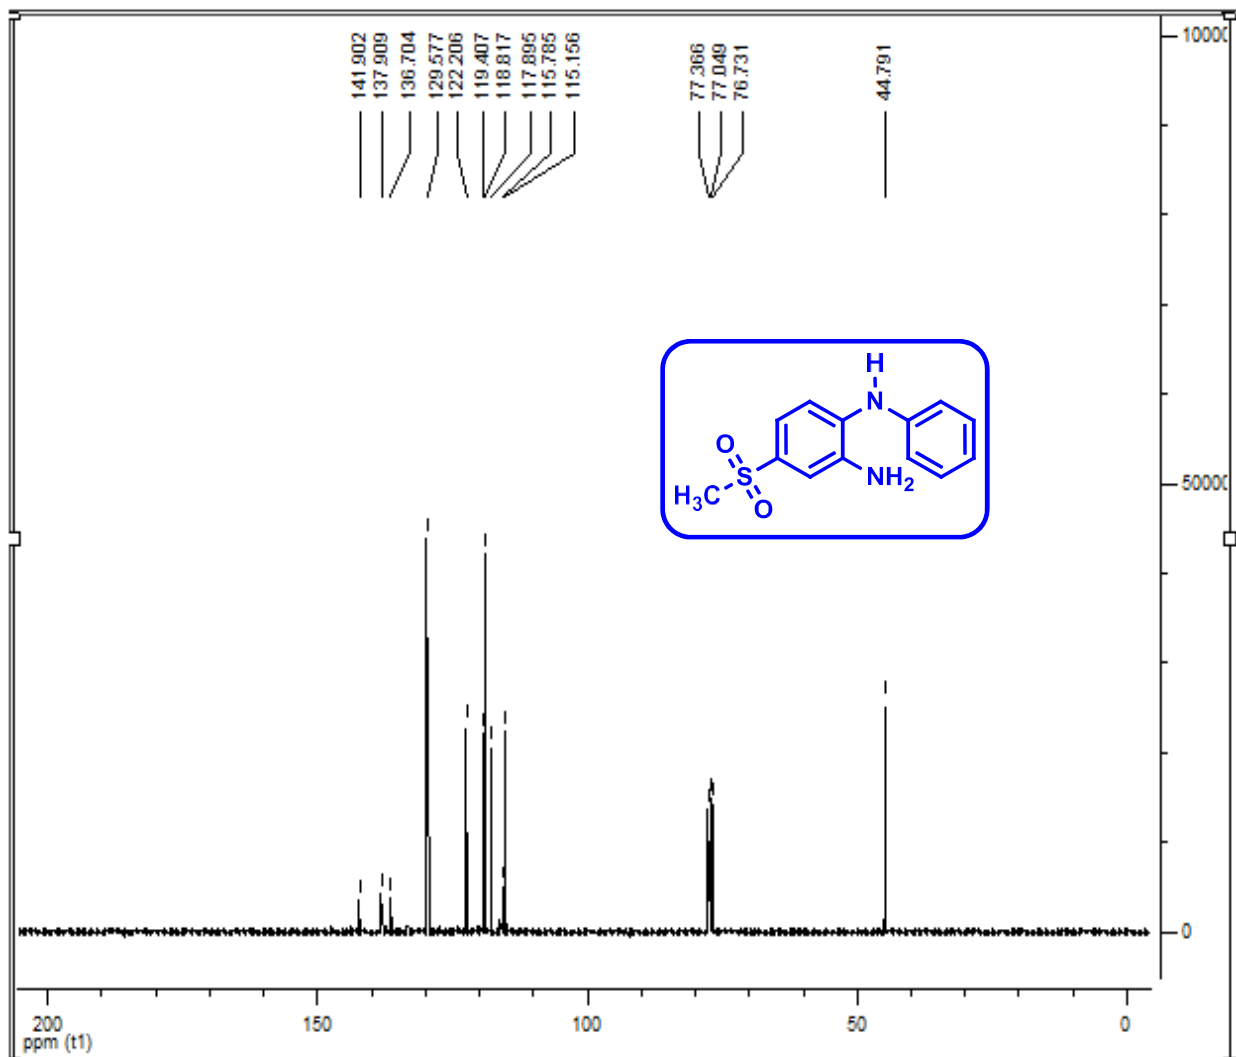

Expanded  $^{13}\text{C}$  NMR spectrum of 3d

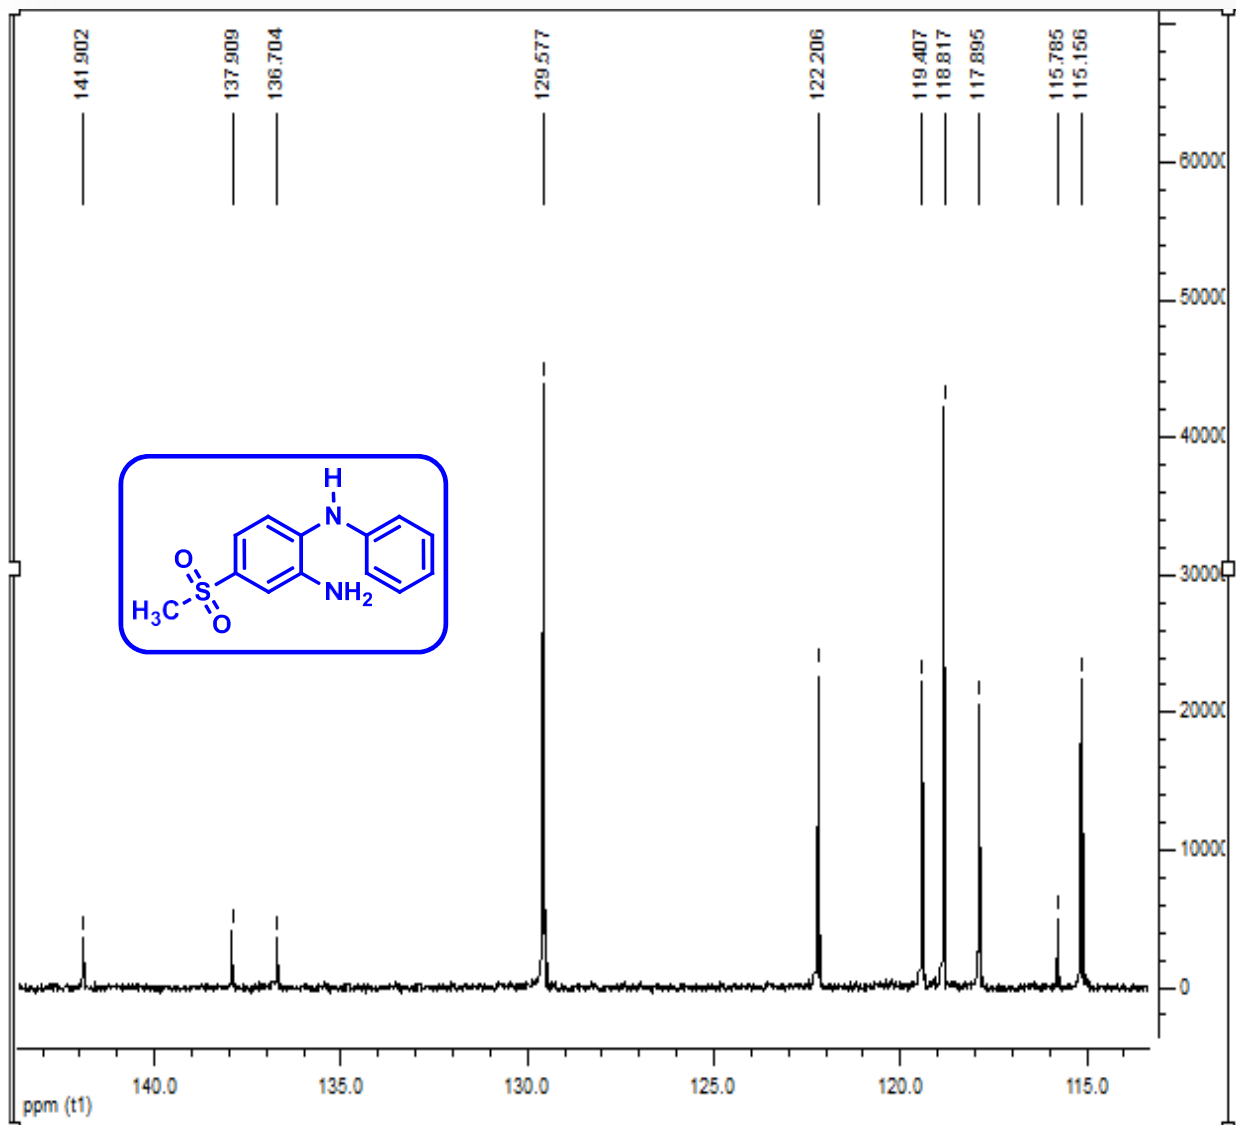

# Mass spectrum of 3d

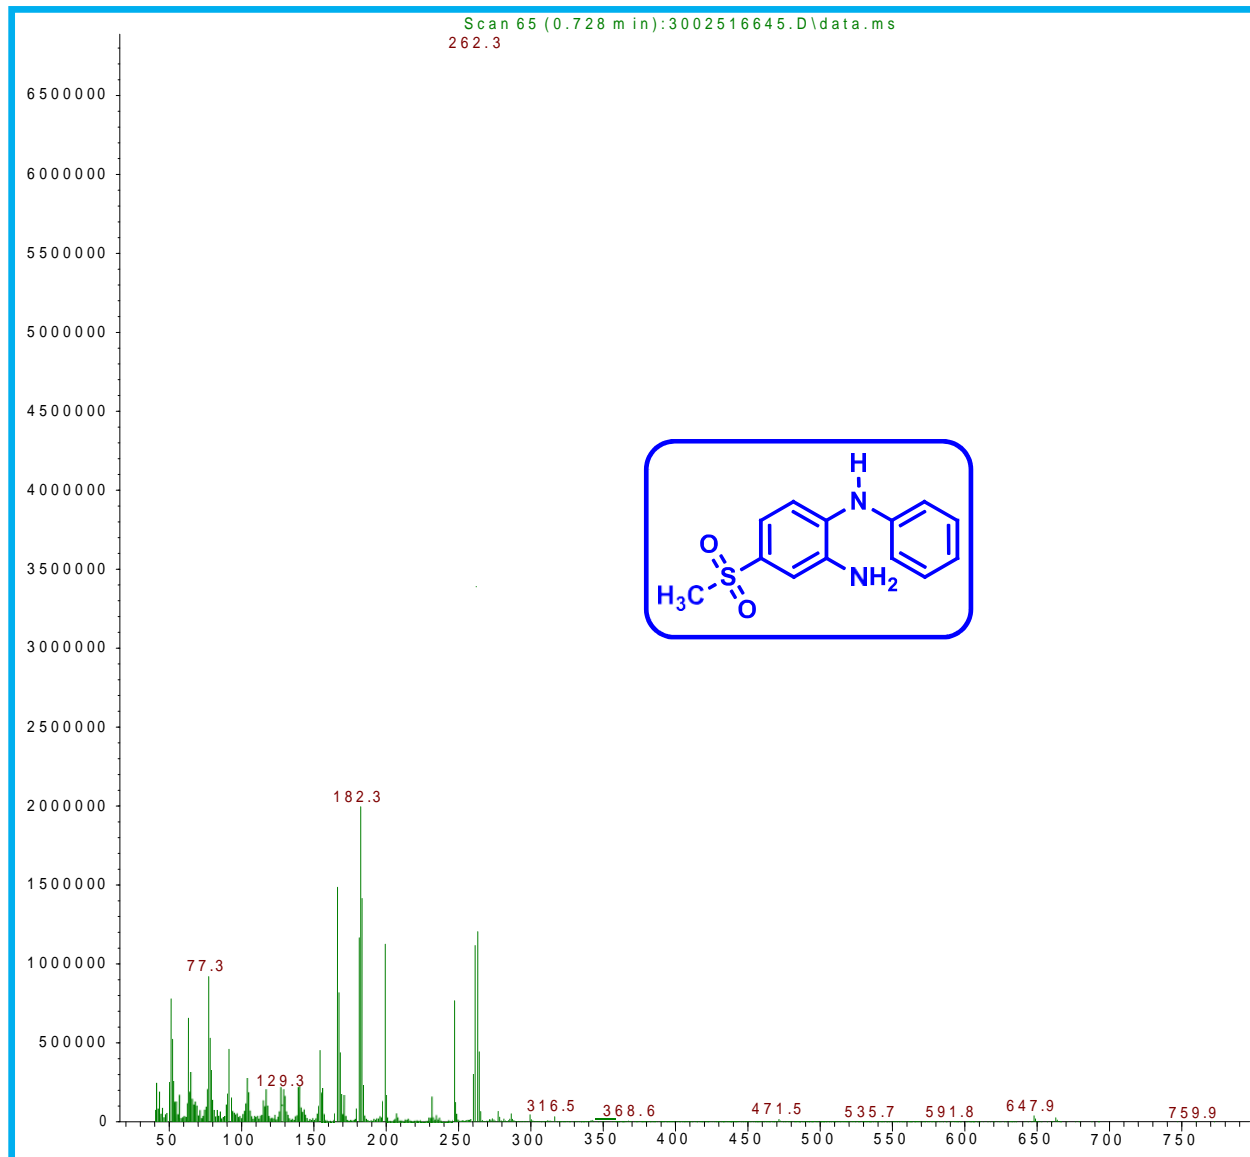

FTIR spectrum of 3d

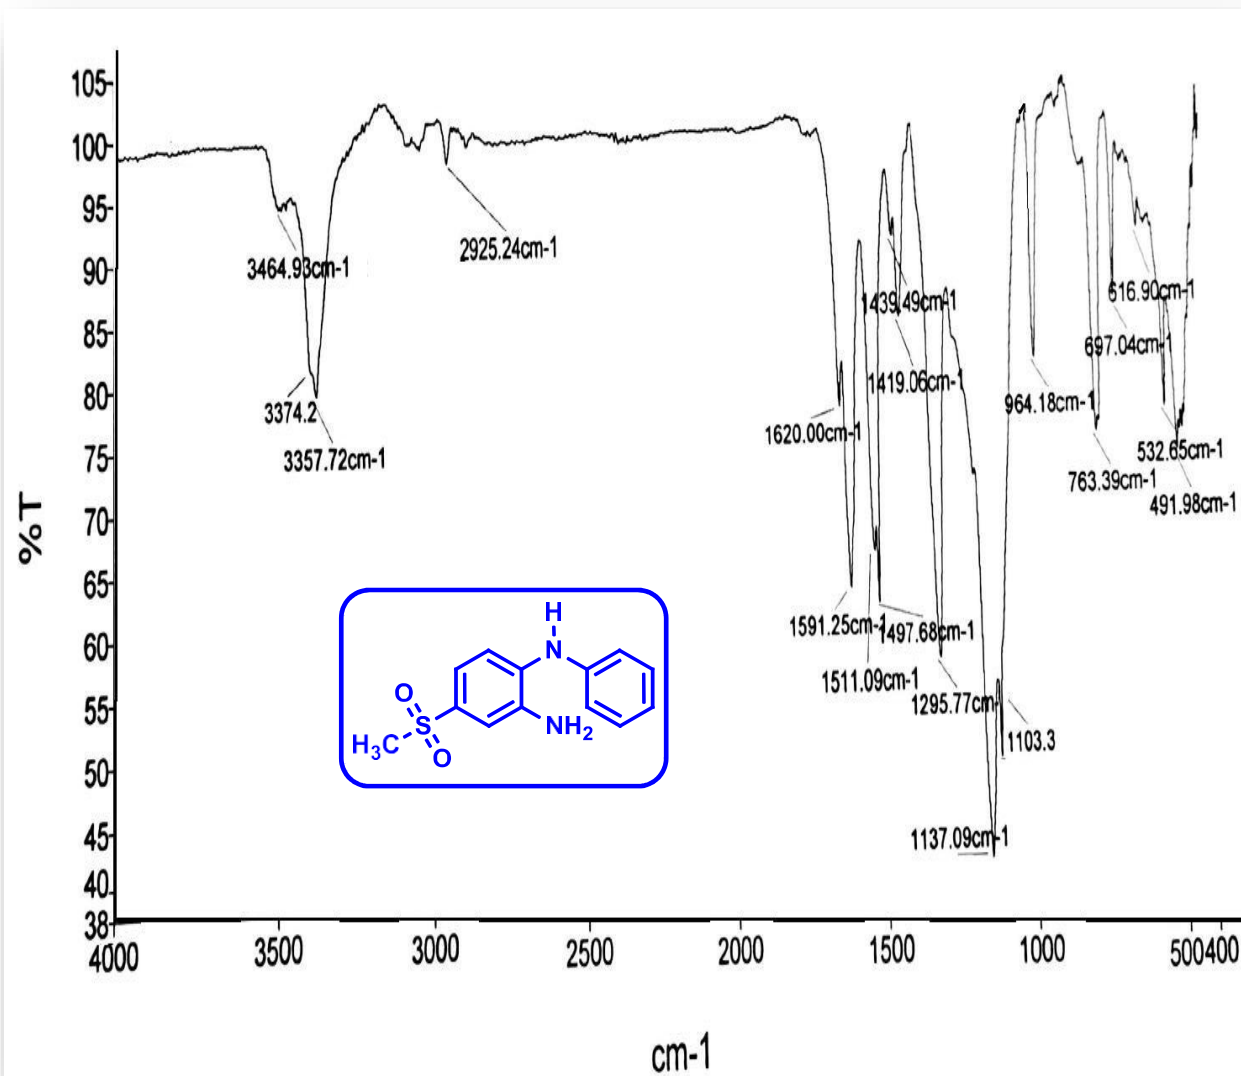

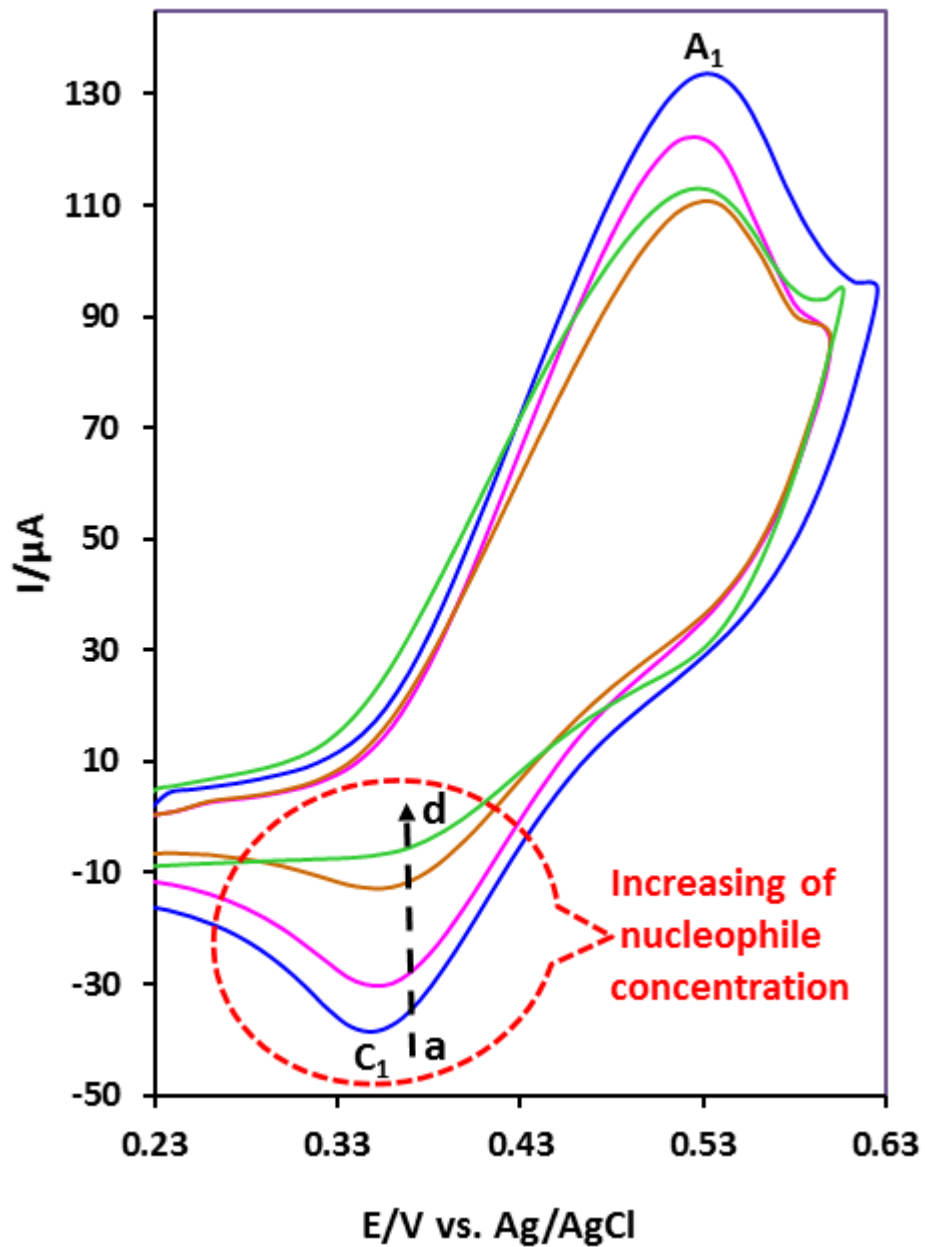

Cyclic voltammograms of **2ADPA** (0.1 mM) in the presence of different concentration of benzenesulfonic acid: (a) 0.00 mM, (b) 0.025 mM, (c) 0.05 mM and (d) 0.10 mM at glassy carbon electrode in water (phosphate buffer,  $c = 0.2$  M,  $\text{pH} = 2.0$ )/ethanol (70/30, v/v) mixture. Scan rate  $5 \text{ V s}^{-1}$ . Temperature =  $25 \text{ }^\circ\text{C}$ .

Dear Depositor,  
Thank you for depositing your crystal structure(s) at the Cambridge Crystallographic Data Centre.  
The data have been assigned to the following deposition numbers.  
CCDC 1407863

---

### Summary of Data CCDC1407863

---

Compound Name:

Formula: C<sub>18</sub> H<sub>15</sub> Cl<sub>1</sub> N<sub>2</sub> O<sub>2</sub> S<sub>1</sub>

Unit Cell Parameters: a 19.109(4) b 8.8080(18) c 20.086(4) Pna21

---

If we have any queries relating to the data then we will contact you later.

Data submitted as a Private Communication will be processed and added to the Cambridge Structural Database (CSD).

Please note, if the data have not appeared in a journal publication 1 year after the date of deposition, and the CCDC cannot contact you to discuss the matter, then the CCDC will automatically include the data

in the CSD as a Private Communication.

Kind regards,

Data Acquisition Team

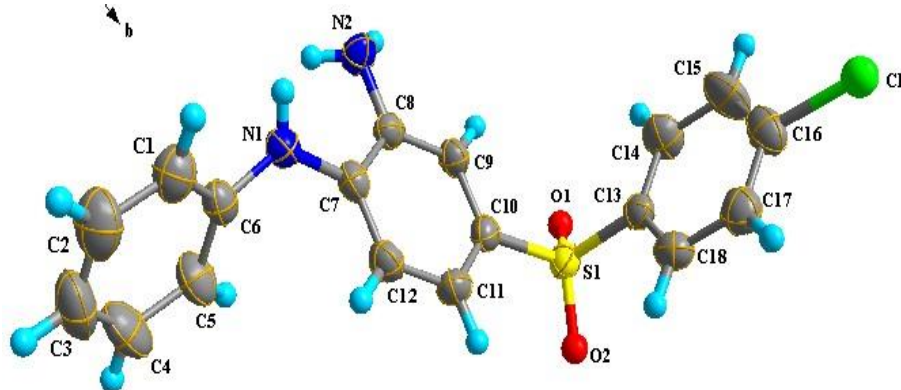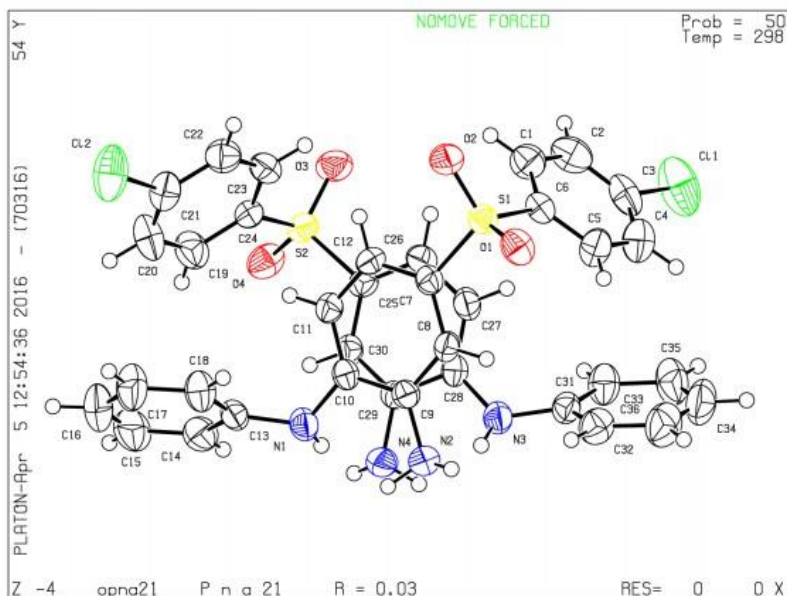



**Table 1. Crystal data and structure refinement for o+pna21.**

|                                   |                                                                                                                |
|-----------------------------------|----------------------------------------------------------------------------------------------------------------|
| Identification code               | o+pna21                                                                                                        |
| Empirical formula                 | C18 H15 Cl N2 O2 S                                                                                             |
| Formula weight                    | 358.83                                                                                                         |
| Temperature                       | 298(2) K                                                                                                       |
| Wavelength                        | 0.71073 Å                                                                                                      |
| Crystal system, space group       | Orthorhombic, Pna2(1)                                                                                          |
| Unit cell dimensions              | a = 19.109(4) Å    alpha = 90 deg.<br>b = 8.8080(18) Å    beta = 90 deg.<br>c = 20.086(4) Å    gamma = 90 deg. |
| Volume                            | 3380.7(12) Å <sup>3</sup>                                                                                      |
| Z, Calculated density             | 8, 1.410 Mg/m <sup>3</sup>                                                                                     |
| Absorption coefficient            | 0.362 mm <sup>-1</sup>                                                                                         |
| F(000)                            | 1488                                                                                                           |
| Crystal size                      | ? x ? x ? mm                                                                                                   |
| Theta range for data collection   | 2.52 to 26.99 deg.                                                                                             |
| Limiting indices                  | -23<=h<=24, -10<=k<=11, -25<=l<=25                                                                             |
| Reflections collected / unique    | 25341 / 7373 [R(int) = 0.0482]                                                                                 |
| Completeness to theta = 26.99     | 99.9 %                                                                                                         |
| Refinement method                 | Full-matrix least-squares on F <sup>2</sup>                                                                    |
| Data / restraints / parameters    | 7373 / 2 / 457                                                                                                 |
| Goodness-of-fit on F <sup>2</sup> | 0.852                                                                                                          |
| Final R indices [I>2sigma(I)]     | R1 = 0.0344, wR2 = 0.0617                                                                                      |
| R indices (all data)              | R1 = 0.0549, wR2 = 0.0654                                                                                      |
| Largest diff. peak and hole       | 0.241 and -0.242 e.Å <sup>-3</sup>                                                                             |

**Table 2. Atomic coordinates ( x 10<sup>4</sup>) and equivalent isotropic displacement parameters (A<sup>2</sup> x 10<sup>3</sup>) for o+pna21. U(eq) is defined as one third of the trace of the orthogonalized Uij tensor.**

|        | x         | y        | z        | U (eq) |
|--------|-----------|----------|----------|--------|
| S (2)  | -588 (1)  | 5683 (1) | 6838 (1) | 41 (1) |
| S (1)  | 3088 (1)  | 5548 (1) | 7143 (1) | 38 (1) |
| C1 (1) | 2333 (1)  | 5998 (1) | 4125 (1) | 94 (1) |
| C1 (2) | 236 (1)   | 7236 (1) | 9774 (1) | 81 (1) |
| O (2)  | 2959 (1)  | 6988 (2) | 7453 (1) | 52 (1) |
| N (3)  | 1454 (1)  | 987 (3)  | 5992 (1) | 43 (1) |
| N (2)  | 2131 (2)  | 108 (3)  | 7427 (1) | 45 (1) |
| O (1)  | 3765 (1)  | 4852 (2) | 7206 (1) | 49 (1) |
| N (4)  | 268 (1)   | 161 (2)  | 6657 (1) | 45 (1) |
| C (25) | 21 (1)    | 4314 (3) | 6554 (1) | 37 (1) |
| C (30) | -106 (1)  | 2795 (3) | 6697 (1) | 37 (1) |
| C (6)  | 2900 (1)  | 5725 (3) | 6280 (1) | 39 (1) |
| C (13) | 481 (1)   | 1479 (3) | 8610 (1) | 40 (1) |
| C (31) | 1955 (1)  | 1100 (3) | 5476 (1) | 41 (1) |
| C (12) | 1854 (1)  | 4786 (3) | 7725 (1) | 42 (1) |
| C (21) | 22 (1)    | 6735 (3) | 8956 (1) | 51 (1) |
| C (28) | 977 (1)   | 2143 (3) | 6157 (1) | 36 (1) |
| C (24) | -337 (1)  | 6079 (3) | 7674 (1) | 37 (1) |
| C (7)  | 2458 (1)  | 4247 (3) | 7429 (1) | 36 (1) |
| C (10) | 1448 (1)  | 2223 (3) | 7855 (1) | 35 (1) |
| N (1)  | 946 (1)   | 1150 (3) | 8074 (1) | 43 (1) |
| O (3)  | -487 (1)  | 7052 (2) | 6457 (1) | 53 (1) |
| C (9)  | 2058 (1)  | 1667 (3) | 7547 (1) | 35 (1) |
| C (11) | 1355 (1)  | 3775 (3) | 7936 (1) | 40 (1) |
| C (23) | 187 (1)   | 7103 (3) | 7794 (1) | 46 (1) |
| C (22) | 375 (2)   | 7450 (3) | 8444 (1) | 51 (1) |
| C (29) | 361 (1)   | 1691 (3) | 6493 (1) | 36 (1) |
| C (8)  | 2561 (1)  | 2689 (3) | 7341 (1) | 35 (1) |
| C (19) | -674 (2)  | 5349 (4) | 8189 (1) | 57 (1) |
| C (26) | 613 (1)   | 4760 (3) | 6216 (1) | 43 (1) |
| C (20) | -487 (2)  | 5705 (4) | 8846 (1) | 66 (1) |
| C (2)  | 2264 (2)  | 6903 (3) | 5398 (1) | 60 (1) |
| C (5)  | 3203 (1)  | 4722 (3) | 5838 (1) | 54 (1) |
| C (18) | 738 (1)   | 2076 (3) | 9197 (1) | 53 (1) |
| C (4)  | 3027 (2)  | 4811 (4) | 5170 (1) | 63 (1) |
| C (27) | 1088 (1)  | 3656 (3) | 6019 (1) | 43 (1) |
| C (14) | -217 (1)  | 1105 (3) | 8565 (1) | 53 (1) |
| C (36) | 1759 (2)  | 1581 (3) | 4845 (1) | 55 (1) |
| C (17) | 295 (2)   | 2277 (4) | 9742 (2) | 74 (1) |
| C (3)  | 2556 (2)  | 5884 (4) | 4964 (1) | 56 (1) |
| C (1)  | 2433 (2)  | 6811 (3) | 6071 (1) | 53 (1) |
| C (33) | 3102 (2)  | 542 (4)  | 5073 (2) | 72 (1) |
| C (32) | 2635 (1)  | 620 (3)  | 5589 (1) | 53 (1) |
| C (15) | -654 (2)  | 1308 (4) | 9111 (2) | 75 (1) |
| C (35) | 2246 (2)  | 1531 (4) | 4332 (1) | 72 (1) |
| C (34) | 2920 (2)  | 1006 (4) | 4455 (2) | 77 (1) |
| C (16) | -391 (2)  | 1873 (4) | 9698 (2) | 83 (1) |
| O (4)  | -1263 (1) | 4983 (2) | 6859 (1) | 53 (1) |

**Table 3. Bond lengths [Å] and angles [deg] for o+pna21.**

---

|               |             |
|---------------|-------------|
| S (2)–O (4)   | 1.4297 (19) |
| S (2)–O (3)   | 1.4413 (19) |
| S (2)–C (25)  | 1.770 (2)   |
| S (2)–C (24)  | 1.782 (2)   |
| S (1)–O (2)   | 1.4342 (18) |
| S (1)–O (1)   | 1.4360 (18) |
| S (1)–C (7)   | 1.759 (2)   |
| S (1)–C (6)   | 1.777 (2)   |
| Cl (1)–C (3)  | 1.740 (2)   |
| Cl (2)–C (21) | 1.749 (3)   |
| N (3)–C (28)  | 1.405 (3)   |
| N (3)–C (31)  | 1.415 (3)   |
| N (3)–H (3)   | 0.84 (2)    |
| N (2)–C (9)   | 1.401 (3)   |
| N (2)–H (2B)  | 0.85 (3)    |
| N (2)–H (2A)  | 0.90 (3)    |
| N (4)–C (29)  | 1.398 (3)   |
| N (4)–H (4A)  | 0.83 (3)    |
| N (4)–H (4B)  | 0.878 (17)  |
| C (25)–C (26) | 1.376 (3)   |
| C (25)–C (30) | 1.390 (3)   |
| C (30)–C (29) | 1.382 (3)   |
| C (30)–H (30) | 0.9300      |
| C (6)–C (1)   | 1.374 (3)   |
| C (6)–C (5)   | 1.381 (3)   |
| C (13)–C (14) | 1.377 (3)   |
| C (13)–C (18) | 1.381 (3)   |
| C (13)–N (1)  | 1.425 (3)   |
| C (31)–C (32) | 1.385 (4)   |
| C (31)–C (36) | 1.388 (3)   |
| C (12)–C (11) | 1.372 (3)   |
| C (12)–C (7)  | 1.382 (3)   |
| C (12)–H (12) | 0.9300      |
| C (21)–C (20) | 1.347 (4)   |
| C (21)–C (22) | 1.383 (4)   |
| C (28)–C (27) | 1.378 (3)   |
| C (28)–C (29) | 1.415 (3)   |
| C (24)–C (23) | 1.369 (3)   |
| C (24)–C (19) | 1.378 (3)   |
| C (7)–C (8)   | 1.397 (3)   |
| C (10)–C (11) | 1.387 (3)   |
| C (10)–C (9)  | 1.409 (3)   |
| C (10)–N (1)  | 1.416 (3)   |
| N (1)–H (1)   | 0.86 (3)    |
| C (9)–C (8)   | 1.381 (3)   |
| C (11)–H (11) | 0.9300      |
| C (23)–C (22) | 1.388 (4)   |
| C (23)–H (23) | 0.9300      |
| C (22)–H (22) | 0.9300      |
| C (8)–H (8)   | 0.9300      |
| C (19)–C (20) | 1.402 (4)   |
| C (19)–H (19) | 0.9300      |
| C (26)–C (27) | 1.388 (4)   |
| C (26)–H (26) | 0.9300      |
| C (20)–H (20) | 0.9300      |
| C (2)–C (3)   | 1.370 (4)   |
| C (2)–C (1)   | 1.392 (4)   |
| C (2)–H (2)   | 0.9300      |
| C (5)–C (4)   | 1.385 (4)   |
| C (5)–H (5)   | 0.9300      |
| C (18)–C (17) | 1.395 (4)   |
| C (18)–H (18) | 0.9300      |
| C (4)–C (3)   | 1.369 (4)   |
| C (4)–H (4)   | 0.9300      |
| C (27)–H (27) | 0.9300      |
| C (14)–C (15) | 1.391 (4)   |
| C (14)–H (14) | 0.9300      |

|                        |             |
|------------------------|-------------|
| C (36) -C (35)         | 1.390 (4)   |
| C (36) -H (36)         | 0.9300      |
| C (17) -C (16)         | 1.361 (5)   |
| C (17) -H (17)         | 0.9300      |
| C (1) -H (1A)          | 0.9300      |
| C (33) -C (34)         | 1.352 (5)   |
| C (33) -C (32)         | 1.369 (4)   |
| C (33) -H (33)         | 0.9300      |
| C (32) -H (32)         | 0.9300      |
| C (15) -C (16)         | 1.374 (5)   |
| C (15) -H (15)         | 0.9300      |
| C (35) -C (34)         | 1.390 (5)   |
| C (35) -H (35)         | 0.9300      |
| C (34) -H (34)         | 0.9300      |
| C (16) -H (16)         | 0.9300      |
| O (4) -S (2) -O (3)    | 119.87 (11) |
| O (4) -S (2) -C (25)   | 108.00 (11) |
| O (3) -S (2) -C (25)   | 108.10 (11) |
| O (4) -S (2) -C (24)   | 107.42 (11) |
| O (3) -S (2) -C (24)   | 107.44 (11) |
| C (25) -S (2) -C (24)  | 105.07 (10) |
| O (2) -S (1) -O (1)    | 119.59 (11) |
| O (2) -S (1) -C (7)    | 108.44 (11) |
| O (1) -S (1) -C (7)    | 108.00 (11) |
| O (2) -S (1) -C (6)    | 108.14 (12) |
| O (1) -S (1) -C (6)    | 107.81 (11) |
| C (7) -S (1) -C (6)    | 103.74 (11) |
| C (28) -N (3) -C (31)  | 124.1 (2)   |
| C (28) -N (3) -H (3)   | 116.3 (17)  |
| C (31) -N (3) -H (3)   | 114.7 (18)  |
| C (9) -N (2) -H (2B)   | 110.3 (19)  |
| C (9) -N (2) -H (2A)   | 109.4 (17)  |
| H (2B) -N (2) -H (2A)  | 114 (3)     |
| C (29) -N (4) -H (4A)  | 111.3 (17)  |
| C (29) -N (4) -H (4B)  | 109 (2)     |
| H (4A) -N (4) -H (4B)  | 113 (3)     |
| C (26) -C (25) -C (30) | 121.3 (2)   |
| C (26) -C (25) -S (2)  | 120.35 (19) |
| C (30) -C (25) -S (2)  | 118.29 (18) |
| C (29) -C (30) -C (25) | 120.2 (2)   |
| C (29) -C (30) -H (30) | 119.9       |
| C (25) -C (30) -H (30) | 119.9       |
| C (1) -C (6) -C (5)    | 121.3 (2)   |
| C (1) -C (6) -S (1)    | 119.45 (18) |
| C (5) -C (6) -S (1)    | 119.18 (19) |
| C (14) -C (13) -C (18) | 119.4 (2)   |
| C (14) -C (13) -N (1)  | 120.4 (2)   |
| C (18) -C (13) -N (1)  | 120.1 (2)   |
| C (32) -C (31) -C (36) | 119.8 (2)   |
| C (32) -C (31) -N (3)  | 119.5 (2)   |
| C (36) -C (31) -N (3)  | 120.5 (2)   |
| C (11) -C (12) -C (7)  | 119.3 (2)   |
| C (11) -C (12) -H (12) | 120.3       |
| C (7) -C (12) -H (12)  | 120.3       |
| C (20) -C (21) -C (22) | 122.5 (2)   |
| C (20) -C (21) -C1 (2) | 119.6 (2)   |
| C (22) -C (21) -C1 (2) | 117.9 (2)   |
| C (27) -C (28) -N (3)  | 123.6 (2)   |
| C (27) -C (28) -C (29) | 119.7 (2)   |
| N (3) -C (28) -C (29)  | 116.6 (2)   |
| C (23) -C (24) -C (19) | 121.1 (2)   |
| C (23) -C (24) -S (2)  | 119.52 (17) |
| C (19) -C (24) -S (2)  | 119.4 (2)   |
| C (12) -C (7) -C (8)   | 120.7 (2)   |
| C (12) -C (7) -S (1)   | 119.20 (18) |
| C (8) -C (7) -S (1)    | 120.11 (18) |
| C (11) -C (10) -C (9)  | 120.0 (2)   |
| C (11) -C (10) -N (1)  | 122.3 (2)   |
| C (9) -C (10) -N (1)   | 117.7 (2)   |
| C (10) -N (1) -C (13)  | 121.4 (2)   |

|                        |            |
|------------------------|------------|
| C (10) -N (1) -H (1)   | 112.4 (18) |
| C (13) -N (1) -H (1)   | 115.8 (19) |
| C (8) -C (9) -N (2)    | 121.2 (2)  |
| C (8) -C (9) -C (10)   | 118.8 (2)  |
| N (2) -C (9) -C (10)   | 119.9 (2)  |
| C (12) -C (11) -C (10) | 121.0 (2)  |
| C (12) -C (11) -H (11) | 119.5      |
| C (10) -C (11) -H (11) | 119.5      |
| C (24) -C (23) -C (22) | 120.0 (2)  |
| C (24) -C (23) -H (23) | 120.0      |
| C (22) -C (23) -H (23) | 120.0      |
| C (21) -C (22) -C (23) | 118.2 (3)  |
| C (21) -C (22) -H (22) | 120.9      |
| C (23) -C (22) -H (22) | 120.9      |
| C (30) -C (29) -N (4)  | 121.8 (2)  |
| C (30) -C (29) -C (28) | 118.7 (2)  |
| N (4) -C (29) -C (28)  | 119.2 (2)  |
| C (9) -C (8) -C (7)    | 120.3 (2)  |
| C (9) -C (8) -H (8)    | 119.9      |
| C (7) -C (8) -H (8)    | 119.9      |
| C (24) -C (19) -C (20) | 118.8 (3)  |
| C (24) -C (19) -H (19) | 120.6      |
| C (20) -C (19) -H (19) | 120.6      |
| C (25) -C (26) -C (27) | 118.6 (2)  |
| C (25) -C (26) -H (26) | 120.7      |
| C (27) -C (26) -H (26) | 120.7      |
| C (21) -C (20) -C (19) | 119.3 (3)  |
| C (21) -C (20) -H (20) | 120.3      |
| C (19) -C (20) -H (20) | 120.3      |
| C (3) -C (2) -C (1)    | 119.0 (3)  |
| C (3) -C (2) -H (2)    | 120.5      |
| C (1) -C (2) -H (2)    | 120.5      |
| C (6) -C (5) -C (4)    | 119.1 (3)  |
| C (6) -C (5) -H (5)    | 120.4      |
| C (4) -C (5) -H (5)    | 120.4      |
| C (13) -C (18) -C (17) | 120.2 (3)  |
| C (13) -C (18) -H (18) | 119.9      |
| C (17) -C (18) -H (18) | 119.9      |
| C (3) -C (4) -C (5)    | 119.4 (3)  |
| C (3) -C (4) -H (4)    | 120.3      |
| C (5) -C (4) -H (4)    | 120.3      |
| C (28) -C (27) -C (26) | 121.3 (2)  |
| C (28) -C (27) -H (27) | 119.3      |
| C (26) -C (27) -H (27) | 119.3      |
| C (13) -C (14) -C (15) | 120.0 (3)  |
| C (13) -C (14) -H (14) | 120.0      |
| C (15) -C (14) -H (14) | 120.0      |
| C (31) -C (36) -C (35) | 119.1 (3)  |
| C (31) -C (36) -H (36) | 120.5      |
| C (35) -C (36) -H (36) | 120.5      |
| C (16) -C (17) -C (18) | 120.0 (3)  |
| C (16) -C (17) -H (17) | 120.0      |
| C (18) -C (17) -H (17) | 120.0      |
| C (4) -C (3) -C (2)    | 121.9 (2)  |
| C (4) -C (3) -C1 (1)   | 119.5 (2)  |
| C (2) -C (3) -C1 (1)   | 118.6 (2)  |
| C (6) -C (1) -C (2)    | 119.3 (3)  |
| C (6) -C (1) -H (1A)   | 120.4      |
| C (2) -C (1) -H (1A)   | 120.4      |
| C (34) -C (33) -C (32) | 120.8 (3)  |
| C (34) -C (33) -H (33) | 119.6      |
| C (32) -C (33) -H (33) | 119.6      |
| C (33) -C (32) -C (31) | 120.2 (3)  |
| C (33) -C (32) -H (32) | 119.9      |
| C (31) -C (32) -H (32) | 119.9      |
| C (16) -C (15) -C (14) | 120.2 (3)  |
| C (16) -C (15) -H (15) | 119.9      |
| C (14) -C (15) -H (15) | 119.9      |
| C (34) -C (35) -C (36) | 119.9 (3)  |
| C (34) -C (35) -H (35) | 120.0      |
| C (36) -C (35) -H (35) | 120.0      |

|                      |           |
|----------------------|-----------|
| C (33)-C (34)-C (35) | 120.2 (3) |
| C (33)-C (34)-H (34) | 119.9     |
| C (35)-C (34)-H (34) | 119.9     |
| C (17)-C (16)-C (15) | 120.2 (3) |
| C (17)-C (16)-H (16) | 119.9     |
| C (15)-C (16)-H (16) | 119.9     |

---

Symmetry transformations used to generate equivalent atoms:

**Table 4. Anisotropic displacement parameters ( $\text{\AA}^2 \times 10^3$ ) for o+pna21.  
The anisotropic displacement factor exponent takes the form:  
 $-2 \pi^2 [ h^2 a^{*2} U_{11} + \dots + 2 h k a^* b^* U_{12} ]$**

|        | U11    | U22     | U33    | U23     | U13     | U12     |
|--------|--------|---------|--------|---------|---------|---------|
| S (2)  | 44 (1) | 35 (1)  | 43 (1) | -2 (1)  | -1 (1)  | 4 (1)   |
| S (1)  | 38 (1) | 38 (1)  | 38 (1) | 0 (1)   | 1 (1)   | -3 (1)  |
| C1 (1) | 84 (1) | 154 (1) | 45 (1) | 15 (1)  | -13 (1) | -25 (1) |
| C1 (2) | 65 (1) | 136 (1) | 43 (1) | -11 (1) | -4 (1)  | 11 (1)  |
| O (2)  | 64 (1) | 41 (1)  | 51 (1) | -7 (1)  | 5 (1)   | -9 (1)  |
| N (3)  | 46 (1) | 45 (1)  | 38 (1) | 4 (1)   | 6 (1)   | 5 (1)   |
| N (2)  | 53 (2) | 37 (1)  | 47 (1) | -2 (1)  | 6 (1)   | 1 (1)   |
| O (1)  | 35 (1) | 59 (1)  | 53 (1) | 7 (1)   | -2 (1)  | -4 (1)  |
| N (4)  | 43 (1) | 37 (1)  | 55 (1) | -1 (1)  | 8 (1)   | -3 (1)  |
| C (25) | 45 (1) | 34 (1)  | 31 (1) | -3 (1)  | -2 (1)  | 2 (1)   |
| C (30) | 33 (1) | 41 (1)  | 36 (1) | -1 (1)  | 6 (1)   | -2 (1)  |
| C (6)  | 38 (1) | 43 (1)  | 35 (1) | 5 (1)   | 1 (1)   | -6 (1)  |
| C (13) | 38 (1) | 41 (2)  | 41 (1) | 7 (1)   | 8 (1)   | -1 (1)  |
| C (31) | 41 (1) | 43 (1)  | 38 (1) | -7 (1)  | 5 (1)   | -4 (1)  |
| C (12) | 53 (2) | 31 (1)  | 41 (1) | -2 (1)  | 7 (1)   | 7 (1)   |
| C (21) | 46 (2) | 65 (2)  | 41 (1) | -1 (1)  | 1 (1)   | 11 (1)  |
| C (28) | 37 (1) | 43 (2)  | 29 (1) | -2 (1)  | 1 (1)   | 1 (1)   |
| C (24) | 38 (1) | 33 (1)  | 39 (1) | 0 (1)   | 4 (1)   | 4 (1)   |
| C (7)  | 40 (1) | 38 (2)  | 31 (1) | 3 (1)   | 2 (1)   | 1 (1)   |
| C (10) | 36 (1) | 42 (1)  | 28 (1) | 2 (1)   | 0 (1)   | -1 (1)  |
| N (1)  | 47 (1) | 48 (1)  | 36 (1) | -3 (1)  | 5 (1)   | -9 (1)  |
| O (3)  | 74 (1) | 40 (1)  | 46 (1) | 4 (1)   | -3 (1)  | 9 (1)   |
| C (9)  | 43 (1) | 35 (1)  | 28 (1) | 3 (1)   | -1 (1)  | 1 (1)   |
| C (11) | 38 (1) | 40 (2)  | 42 (1) | 2 (1)   | 8 (1)   | 6 (1)   |
| C (23) | 54 (2) | 41 (1)  | 43 (1) | 6 (1)   | 4 (1)   | -3 (1)  |
| C (22) | 52 (2) | 49 (2)  | 52 (2) | -3 (1)  | -3 (1)  | -3 (1)  |
| C (29) | 41 (1) | 34 (1)  | 32 (1) | -1 (1)  | -2 (1)  | -3 (1)  |
| C (8)  | 34 (1) | 40 (1)  | 32 (1) | -1 (1)  | 4 (1)   | 6 (1)   |
| C (19) | 52 (2) | 63 (2)  | 55 (2) | -1 (1)  | 6 (1)   | -16 (2) |
| C (26) | 53 (2) | 35 (2)  | 42 (1) | 1 (1)   | 5 (1)   | -7 (1)  |
| C (20) | 60 (2) | 93 (2)  | 44 (1) | 11 (2)  | 12 (1)  | -9 (2)  |
| C (2)  | 60 (2) | 59 (2)  | 60 (2) | 15 (2)  | -14 (2) | -2 (2)  |
| C (5)  | 54 (2) | 62 (2)  | 44 (1) | -2 (1)  | 3 (1)   | 12 (1)  |
| C (18) | 46 (2) | 73 (2)  | 39 (1) | 1 (1)   | 1 (1)   | -1 (1)  |
| C (4)  | 62 (2) | 81 (2)  | 47 (2) | -6 (1)  | 6 (1)   | 2 (2)   |
| C (27) | 42 (1) | 47 (2)  | 38 (1) | 0 (1)   | 9 (1)   | -5 (1)  |
| C (14) | 47 (2) | 52 (2)  | 61 (2) | 0 (1)   | 3 (1)   | -7 (1)  |
| C (36) | 50 (2) | 74 (2)  | 39 (1) | -7 (1)  | 0 (1)   | -3 (1)  |
| C (17) | 81 (2) | 97 (3)  | 43 (1) | -8 (2)  | 16 (2)  | -2 (2)  |
| C (3)  | 55 (2) | 78 (2)  | 37 (1) | 11 (1)  | -1 (1)  | -24 (2) |
| C (1)  | 59 (2) | 52 (2)  | 48 (2) | 5 (1)   | -3 (1)  | 4 (2)   |
| C (33) | 45 (2) | 84 (2)  | 86 (2) | -12 (2) | 12 (2)  | 3 (2)   |
| C (32) | 42 (2) | 56 (2)  | 62 (2) | -5 (1)  | 0 (1)   | 2 (1)   |
| C (15) | 46 (2) | 79 (2)  | 99 (2) | 8 (2)   | 22 (2)  | -7 (2)  |
| C (35) | 81 (2) | 96 (3)  | 38 (1) | -6 (1)  | 9 (2)   | -16 (2) |
| C (34) | 66 (2) | 90 (3)  | 76 (2) | -20 (2) | 33 (2)  | -5 (2)  |
| C (16) | 77 (2) | 100 (3) | 73 (2) | -2 (2)  | 41 (2)  | -2 (2)  |
| O (4)  | 39 (1) | 51 (1)  | 69 (1) | -11 (1) | -4 (1)  | 4 (1)   |
